# Supplementary material
Source: PubMed Central journal article supplement (PMC4125441)
Supplement: NIHMS604594-supplement-01.pdf [file NIHMS604594-supplement-01.pdf]

## Supplementary Materials

### Supplementary Methods

#### *Flow cytometry*

Thy/Liv implants were analyzed by flow cytometry for assessment of thymocyte subpopulation percentages and implant quality, and data for individual mice in each cohort are shown in Supplementary Tables 1–13.

Single-cell suspensions were made by placing the implant into a sterile nylon mesh bag, submerging the bag in phosphate-buffered saline (PBS)/2% fetal bovine serum (FBS) in a 60 mm tissue culture dish, and dispersing the tissue between the nylon layers with forceps. The cells were counted with a Coulter counter to determine total implant cellularity, and  $10^6$  cells per well were surface stained with anti-CD4 PE-Cy7 (BD Biosciences), anti-CD8 PE-Cy5.5 (Caltag Laboratories), and anti-CD3 APC-Cy7 (eBiosciences). Following cell surface staining, cells were fixed and permeabilized with 1.2% paraformaldehyde and 0.5% Tween 20, stained with anti-p24 FITC (Beckman Coulter), and analyzed on a LSR II flow cytometer (BD Biosciences). After collecting 100,000 total cell events, percentages of CD4<sup>+</sup> single positive, CD8<sup>+</sup> single positive and CD4<sup>+</sup>CD8<sup>+</sup> double-positive (DP) thymocytes in the implant samples were determined by first gating on a live lymphoid cell population identified by forward- and side-scatter characteristics, and then by gating for CD3 expression. CD4/CD8 ratios were calculated by dividing the percentage of CD4<sup>+</sup> cells by the percentage of CD8<sup>+</sup> cells for each individual implant.

**Supplementary Table 1.** Data for individual mice in Figure 2A (cohort generated with tissues from donor A).

| Drug | Drug dose (µg/dose) | Mouse ID | Drug route | p24 (pg/10 <sup>6</sup> cells) | HIV RNA (log <sub>10</sub> copies/10 <sup>6</sup> cells) | Thy/Liv Implant Cells                                 |                         |                         |               | Total cell yield (x 10 <sup>6</sup> ) |
|------|---------------------|----------|------------|--------------------------------|----------------------------------------------------------|-------------------------------------------------------|-------------------------|-------------------------|---------------|---------------------------------------|
|      |                     |          |            |                                |                                                          | CD4 <sup>+</sup> CD8 <sup>+</sup> Double-positive (%) | CD4 Single-positive (%) | CD8 Single-positive (%) | CD4/CD8 ratio |                                       |
| NA   | Untreated           | 36       | NA         | 33.0                           | 4.79                                                     | 84.8                                                  | 8.9                     | 3.0                     | 2.9           | 63                                    |
| NA   | Untreated           | 37       | NA         | 107.7                          | 4.62                                                     | 80.8                                                  | 8.5                     | 3.5                     | 2.4           | 486                                   |
| NA   | Untreated           | 38       | NA         | 49.5                           | 5.12                                                     | 82.5                                                  | 6.8                     | 3.2                     | 2.1           | 463                                   |
| NA   | Untreated           | 39       | NA         | 21.0                           | 4.76                                                     | 67.8                                                  | 8.6                     | 3.5                     | 2.4           | 191                                   |
| NA   | Untreated           | 40       | NA         | 122.8                          | 4.23                                                     | 80.4                                                  | 7.9                     | 3.7                     | 2.1           | 1140                                  |
| NA   | Untreated           | 41       | NA         | 148.9                          | 4.40                                                     | 84.5                                                  | 6.5                     | 3.3                     | 2.0           | 1042                                  |
| NA   | Untreated           | 42       | NA         | 39.8                           | 5.26                                                     | 80.2                                                  | 7.5                     | 3.2                     | 2.3           | 925                                   |
| PG16 | 1.5                 | 25       | i.p.       | 0.0                            | 1.96                                                     | 78.2                                                  | 10.3                    | 3.7                     | 2.8           | 623                                   |
| PG16 | 1.5                 | 26       | i.p.       | 0.0                            | 3.24                                                     | 82.3                                                  | 8.4                     | 3.3                     | 2.5           | 402                                   |
| PG16 | 1.5                 | 27       | i.p.       | 0.0                            | <1.48                                                    | 77.3                                                  | 9.1                     | 3.4                     | 2.7           | 481                                   |
| PG16 | 1.5                 | 28*      | i.p.       | ND                             | ND                                                       | ND                                                    | ND                      | ND                      | ND            | ND                                    |
| PG16 | 1.5                 | 29       | i.p.       | 0.0                            | <1.48                                                    | 76.1                                                  | 10.6                    | 3.8                     | 2.8           | 540                                   |
| PG16 | 1.5                 | 30       | i.p.       | 0.0                            | <1.48                                                    | 83.0                                                  | 6.4                     | 2.8                     | 2.3           | 860                                   |
| PG16 | 5                   | 19       | i.p.       | 0.0                            | <1.48                                                    | 75.2                                                  | 12.0                    | 4.2                     | 2.9           | 253                                   |
| PG16 | 5                   | 20       | i.p.       | 0.0                            | 1.50                                                     | 73.8                                                  | 11.2                    | 4.6                     | 2.4           | 740                                   |
| PG16 | 5                   | 21       | i.p.       | 0.0                            | 2.34                                                     | 74.8                                                  | 12.1                    | 4.3                     | 2.8           | 408                                   |
| PG16 | 5                   | 22       | i.p.       | 11.8                           | 3.89                                                     | 76.9                                                  | 9.9                     | 4.2                     | 2.4           | 883                                   |
| PG16 | 5                   | 23       | i.p.       | 0.0                            | <1.48                                                    | 88.4                                                  | 4.4                     | 2.2                     | 2.0           | 76                                    |
| PG16 | 5                   | 24       | i.p.       | 0.0                            | <1.48                                                    | 83.7                                                  | 6.5                     | 2.6                     | 2.5           | 1140                                  |
| PG16 | 15                  | 13*      | i.p.       | ND                             | ND                                                       | ND                                                    | ND                      | ND                      | ND            | ND                                    |
| PG16 | 15                  | 14       | i.p.       | 0.0                            | <1.48                                                    | 81.9                                                  | 7.7                     | 3.1                     | 2.6           | 394                                   |
| PG16 | 15                  | 15†      | i.p.       | ND                             | ND                                                       | ND                                                    | ND                      | ND                      | ND            | ND                                    |
| PG16 | 15                  | 16       | i.p.       | 0.0                            | <1.48                                                    | 82.4                                                  | 7.2                     | 3.3                     | 2.2           | 823                                   |
| PG16 | 15                  | 17       | i.p.       | 0.0                            | 1.51                                                     | 80.4                                                  | 7.6                     | 3.3                     | 2.3           | 1487                                  |
| PG16 | 15                  | 18       | i.p.       | 0.0                            | <1.48                                                    | 74.6                                                  | 10.4                    | 3.7                     | 2.8           | 762                                   |
| PG16 | 50                  | 7        | i.p.       | 0.0                            | <1.48                                                    | 74.7                                                  | 11.6                    | 4.9                     | 2.4           | 571                                   |
| PG16 | 50                  | 8        | i.p.       | 0.0                            | <1.48                                                    | 79.9                                                  | 10.2                    | 3.8                     | 2.7           | 304                                   |
| PG16 | 50                  | 9        | i.p.       | 0.0                            | <1.48                                                    | 77.5                                                  | 10.6                    | 4.6                     | 2.3           | 178                                   |
| PG16 | 50                  | 10*      | i.p.       | ND                             | ND                                                       | ND                                                    | ND                      | ND                      | ND            | ND                                    |
| PG16 | 50                  | 11       | i.p.       | 0.0                            | 2.14                                                     | 35.3                                                  | 22.4                    | 26.8                    | 0.8           | 14                                    |
| PG16 | 50                  | 12       | i.p.       | 0.0                            | <1.48                                                    | 83.7                                                  | 6.7                     | 3.1                     | 2.2           | 667                                   |
| PG16 | 150                 | 1        | i.p.       | 0.0                            | <1.48                                                    | 78.6                                                  | 9.1                     | 3.8                     | 2.4           | 1002                                  |
| PG16 | 150                 | 2*       | i.p.       | ND                             | ND                                                       | ND                                                    | ND                      | ND                      | ND            | ND                                    |
| PG16 | 150                 | 3        | i.p.       | 0.0                            | <1.48                                                    | 77.8                                                  | 9.1                     | 4.2                     | 2.2           | 490                                   |
| PG16 | 150                 | 4        | i.p.       | 0.0                            | <1.48                                                    | 81.3                                                  | 9.1                     | 3.8                     | 2.4           | 622                                   |
| PG16 | 150                 | 5        | i.p.       | 0.0                            | <1.48                                                    | 78.4                                                  | 8.8                     | 3.4                     | 2.6           | 790                                   |
| PG16 | 150                 | 6        | i.p.       | 0.0                            | 2.01                                                     | 81.5                                                  | 7.9                     | 3.6                     | 2.2           | 382                                   |
| 3TC  | 30 mg/kg/day        | 31       | i.p.       | 0.0                            | <1.48                                                    | 83.5                                                  | 7.3                     | 2.9                     | 2.5           | 672                                   |
| 3TC  | 30 mg/kg/day        | 32       | i.p.       | 0.0                            | <1.48                                                    | 85.3                                                  | 6.6                     | 2.7                     | 2.4           | 360                                   |
| 3TC  | 30 mg/kg/day        | 33       | i.p.       | 0.0                            | 2.25                                                     | 90.2                                                  | 4.8                     | 1.7                     | 2.9           | 666                                   |
| 3TC  | 30 mg/kg/day        | 34       | i.p.       | 0.0                            | <1.48                                                    | 77.1                                                  | 10.6                    | 4.2                     | 2.5           | 497                                   |
| 3TC  | 30 mg/kg/day        | 35       | i.p.       | 0.0                            | 2.39                                                     | 81.7                                                  | 8.2                     | 3.1                     | 2.7           | 633                                   |
| NA   | Mock-infected       | 43       | NA         | 0.0                            | <1.48                                                    | 68.9                                                  | 15.9                    | 7.1                     | 2.2           | 329                                   |
| NA   | Mock-infected       | 44*      | NA         | ND                             | ND                                                       | ND                                                    | ND                      | ND                      | ND            | ND                                    |
| NA   | Mock-infected       | 45       | NA         | 0.0                            | <1.48                                                    | 80.6                                                  | 7.9                     | 3.6                     | 2.2           | 820                                   |
| NA   | Mock-infected       | 46       | NA         | 0.0                            | <1.48                                                    | 77.1                                                  | 9.9                     | 3.8                     | 2.6           | 704                                   |
| NA   | Mock-infected       | 47       | NA         | 0.0                            | <1.48                                                    | 81.2                                                  | 9.0                     | 3.8                     | 2.4           | 598                                   |

NA: Not applicable

ND: Not determined

\* mouse died

† abnormal implant

**Supplementary Table 2.** Data for individual mice in Figure 2B (cohort generated with tissues from donor B).

| Drug    | Drug dose (µg/dose) | Mouse ID | Drug route | p24 (pg/10 <sup>6</sup> cells) | HIV RNA (log <sub>10</sub> copies/10 <sup>6</sup> cells) | Thy/Liv Implant Cells                                 |                         |                         |               | Total cell yield (x 10 <sup>6</sup> ) |
|---------|---------------------|----------|------------|--------------------------------|----------------------------------------------------------|-------------------------------------------------------|-------------------------|-------------------------|---------------|---------------------------------------|
|         |                     |          |            |                                |                                                          | CD4 <sup>+</sup> CD8 <sup>+</sup> Double-positive (%) | CD4 Single-positive (%) | CD8 Single-positive (%) | CD4/CD8 ratio |                                       |
| NA      | Untreated           | 36*      | NA         | ND                             | ND                                                       | ND                                                    | ND                      | ND                      | ND            | ND                                    |
| NA      | Untreated           | 37*      | NA         | ND                             | ND                                                       | ND                                                    | ND                      | ND                      | ND            | ND                                    |
| NA      | Untreated           | 38       | NA         | 423.1                          | 5.32                                                     | 35.7                                                  | 16.9                    | 13.0                    | 1.3           | 15                                    |
| NA      | Untreated           | 39       | NA         | 447.0                          | 5.16                                                     | 70.0                                                  | 11.2                    | 8.4                     | 1.3           | 36                                    |
| NA      | Untreated           | 40       | NA         | 250.2                          | 4.85                                                     | 74.9                                                  | 8.6                     | 7.1                     | 1.2           | 27                                    |
| NA      | Untreated           | 41       | NA         | 262.7                          | 4.87                                                     | 72.1                                                  | 9.9                     | 7.8                     | 1.3           | 29                                    |
| NA      | Untreated           | 42       | NA         | 104.8                          | 4.78                                                     | 78.3                                                  | 9.6                     | 4.6                     | 2.1           | 86                                    |
| PG16    | 0.05                | 15       | i.p.       | 480.0                          | 5.16                                                     | 49.9                                                  | 20.3                    | 12.6                    | 1.6           | 25                                    |
| PG16    | 0.05                | 16       | i.p.       | 324.6                          | 3.67                                                     | 20.9                                                  | 4.7                     | 4.8                     | 1.0           | 33                                    |
| PG16    | 0.05                | 17       | i.p.       | 273.5                          | 4.90                                                     | 63.0                                                  | 12.6                    | 11.4                    | 1.1           | 21                                    |
| PG16    | 0.05                | 18*      | i.p.       | ND                             | ND                                                       | ND                                                    | ND                      | ND                      | ND            | ND                                    |
| PG16    | 0.05                | 19       | i.p.       | 264.2                          | 3.77                                                     | 47.9                                                  | 6.8                     | 6.3                     | 1.1           | 57                                    |
| PG16    | 0.05                | 20       | i.p.       | 279.1                          | 5.26                                                     | 64.4                                                  | 7.9                     | 6.2                     | 1.3           | 130                                   |
| PG16    | 0.05                | 21       | i.p.       | 318.2                          | 5.07                                                     | 67.1                                                  | 12.1                    | 8.4                     | 1.4           | 53                                    |
| PG16    | 0.5                 | 8        | i.p.       | 283.9                          | 5.33                                                     | 65.4                                                  | 10.2                    | 8.0                     | 1.3           | 58                                    |
| PG16    | 0.5                 | 9        | i.p.       | 750.9                          | 5.14                                                     | 21.7                                                  | 36.8                    | 17.6                    | 2.1           | 24                                    |
| PG16    | 0.5                 | 10       | i.p.       | 48.6                           | 4.79                                                     | 83.2                                                  | 8.3                     | 3.4                     | 2.4           | 35                                    |
| PG16    | 0.5                 | 11       | i.p.       | 294.1                          | 5.04                                                     | 8.6                                                   | 16.1                    | 9.6                     | 1.7           | 9                                     |
| PG16    | 0.5                 | 12*      | i.p.       | ND                             | ND                                                       | ND                                                    | ND                      | ND                      | ND            | ND                                    |
| PG16    | 0.5                 | 13       | i.p.       | 425.0                          | 4.86                                                     | 79.5                                                  | 6.2                     | 5.0                     | 1.2           | 39                                    |
| PG16    | 0.5                 | 14       | i.p.       | 312.9                          | 5.04                                                     | 79.2                                                  | 7.1                     | 5.4                     | 1.3           | 45                                    |
| PG16    | 5.0                 | 1        | i.p.       | 0.0                            | <1.48                                                    | 64.4                                                  | 18.4                    | 7.1                     | 2.6           | 88                                    |
| PG16    | 5.0                 | 2        | i.p.       | 0.0                            | 2.18                                                     | 81.2                                                  | 9.1                     | 3.0                     | 3.0           | 252                                   |
| PG16    | 5.0                 | 3        | i.p.       | 28.5                           | 4.57                                                     | 81.9                                                  | 7.3                     | 2.4                     | 3.1           | 122                                   |
| PG16    | 5.0                 | 4        | i.p.       | 0.0                            | 3.47                                                     | 85.2                                                  | 7.6                     | 2.1                     | 3.6           | 240                                   |
| PG16    | 5.0                 | 5*       | i.p.       | ND                             | ND                                                       | ND                                                    | ND                      | ND                      | ND            | ND                                    |
| PG16    | 5.0                 | 6        | i.p.       | 154.4                          | 3.79                                                     | 71.8                                                  | 12.9                    | 5.0                     | 2.6           | 49                                    |
| PG16    | 5.0                 | 7†       | i.p.       | ND                             | ND                                                       | ND                                                    | ND                      | ND                      | ND            | ND                                    |
| Truvada | 200/130 mg/kg       | 29       | oral       | 464.3                          | 5.20                                                     | 71.2                                                  | 12.8                    | 7.8                     | 1.6           | 53                                    |
| Truvada | 200/130 mg/kg       | 30       | oral       | 0.0                            | 4.31                                                     | 30.0                                                  | 9.1                     | 46.2                    | 0.2           | 4                                     |
| Truvada | 200/130 mg/kg       | 31       | oral       | 235.2                          | 4.70                                                     | 82.2                                                  | 7.1                     | 4.0                     | 1.7           | 52                                    |
| Truvada | 200/130 mg/kg       | 32       | oral       | 127.8                          | 4.45                                                     | 82.4                                                  | 6.6                     | 4.7                     | 1.4           | 145                                   |
| Truvada | 200/130 mg/kg       | 33       | oral       | 143.2                          | 4.51                                                     | 82.9                                                  | 6.6                     | 3.5                     | 1.9           | 120                                   |
| Truvada | 200/130 mg/kg       | 34       | oral       | 246.3                          | 4.69                                                     | 79.3                                                  | 8.4                     | 5.0                     | 1.7           | 90                                    |
| Truvada | 200/130 mg/kg       | 35       | oral       | 259.4                          | 4.65                                                     | 78.2                                                  | 7.7                     | 4.3                     | 1.8           | 79                                    |
| Truvada | 2000/1300 mg/kg     | 22       | oral       | 0.0                            | 1.49                                                     | 33.6                                                  | 1.9                     | 1.5                     | 1.3           | 152                                   |
| Truvada | 2000/1300 mg/kg     | 23       | oral       | 85.4                           | 4.92                                                     | 79.3                                                  | 9.1                     | 5.1                     | 1.8           | 21                                    |
| Truvada | 2000/1300 mg/kg     | 24       | oral       | 192.9                          | 5.17                                                     | 70.7                                                  | 12.1                    | 7.8                     | 1.5           | 25                                    |
| Truvada | 2000/1300 mg/kg     | 25       | oral       | 136.0                          | 4.33                                                     | 75.4                                                  | 10.4                    | 4.6                     | 2.3           | 126                                   |
| Truvada | 2000/1300 mg/kg     | 26*      | oral       | ND                             | ND                                                       | ND                                                    | ND                      | ND                      | ND            | ND                                    |
| Truvada | 2000/1300 mg/kg     | 27       | oral       | 279.8                          | 4.96                                                     | 78.1                                                  | 8.0                     | 4.6                     | 1.7           | 56                                    |
| Truvada | 2000/1300 mg/kg     | 28       | oral       | 41.4                           | 3.51                                                     | 65.8                                                  | 6.6                     | 3.3                     | 2.0           | 74                                    |
| NA      | Mock-infected       | 43       | NA         | 0.0                            | <1.48                                                    | 86.1                                                  | 6.8                     | 2.5                     | 2.7           | 230                                   |
| NA      | Mock-infected       | 44       | NA         | 0.0                            | <1.48                                                    | 86.7                                                  | 7.7                     | 2.2                     | 3.5           | 87                                    |
| NA      | Mock-infected       | 45       | NA         | 0.0                            | <1.48                                                    | 89.9                                                  | 5.7                     | 1.7                     | 3.4           | 76                                    |
| NA      | Mock-infected       | 46       | NA         | 0.0                            | <1.48                                                    | 81.4                                                  | 9.4                     | 3.2                     | 2.9           | 31                                    |
| NA      | Mock-infected       | 47       | NA         | 0.0                            | <1.48                                                    | 88.9                                                  | 5.4                     | 1.7                     | 3.1           | 200                                   |
| NA      | Mock-infected       | 48†      | NA         | ND                             | ND                                                       | ND                                                    | ND                      | ND                      | ND            | ND                                    |
| NA      | Mock-infected       | 49       | NA         | 0.0                            | <1.48                                                    | 87.2                                                  | 6.6                     | 2.0                     | 3.3           | 180                                   |

NA: Not applicable

ND: Not determined

\* mouse died

† abnormal implant

**Supplementary Table 3.** Data for individual mice in Figure 2C (cohort generated with tissues from donor C).

| Drug | 5 µg dose<br>(days before<br>inoculation) | Mouse<br>ID | Drug<br>route | p24<br>(pg/10 <sup>6</sup><br>cells) | HIV RNA<br>(log <sub>10</sub><br>copies/<br>10 <sup>6</sup> cells) | Thy/Liv Implant Cells                                           |                                   |                                   |                  | Total cell<br>yield<br>(x 10 <sup>6</sup> ) |
|------|-------------------------------------------|-------------|---------------|--------------------------------------|--------------------------------------------------------------------|-----------------------------------------------------------------|-----------------------------------|-----------------------------------|------------------|---------------------------------------------|
|      |                                           |             |               |                                      |                                                                    | CD4 <sup>+</sup> CD8 <sup>+</sup><br>Double-<br>positive<br>(%) | CD4<br>Single-<br>positive<br>(%) | CD8<br>Single-<br>positive<br>(%) | CD4/CD8<br>ratio |                                             |
| NA   | Untreated                                 | 22          | NA            | 53.0                                 | 4.82                                                               | 71.4                                                            | 12.5                              | 10.5                              | 1.2              | 39                                          |
| NA   | Untreated                                 | 23          | NA            | 93.4                                 | 5.14                                                               | 74.8                                                            | 8.8                               | 8.4                               | 1.0              | 122                                         |
| NA   | Untreated                                 | 24          | NA            | 69.1                                 | 5.10                                                               | 65.8                                                            | 14.4                              | 9.1                               | 1.6              | 143                                         |
| NA   | Untreated                                 | 25          | NA            | 32.7                                 | 4.72                                                               | 78.5                                                            | 7.6                               | 8.1                               | 0.9              | 57                                          |
| NA   | Untreated                                 | 26          | NA            | 43.6                                 | 4.61                                                               | 79.3                                                            | 7.6                               | 7.5                               | 1.0              | 46                                          |
| NA   | Untreated                                 | 27          | NA            | 40.9                                 | 4.86                                                               | 73.8                                                            | 9.7                               | 8.6                               | 1.1              | 164                                         |
| NA   | Untreated                                 | 28          | NA            | 48.1                                 | 5.03                                                               | 74.7                                                            | 7.5                               | 7.9                               | 1.0              | 67                                          |
| PG16 | -14                                       | 1           | i.p.          | 62.5                                 | 4.51                                                               | 72.7                                                            | 11.1                              | 8.2                               | 1.4              | 70                                          |
| PG16 | -14                                       | 2           | i.p.          | 51.6                                 | 4.67                                                               | 68.3                                                            | 13.9                              | 11.4                              | 1.2              | 192                                         |
| PG16 | -14                                       | 3           | i.p.          | 45.5                                 | 4.77                                                               | 70.0                                                            | 13.9                              | 9.6                               | 1.5              | 101                                         |
| PG16 | -14                                       | 4           | i.p.          | 41.9                                 | 4.54                                                               | 72.5                                                            | 11.6                              | 9.9                               | 1.2              | 123                                         |
| PG16 | -14                                       | 5           | i.p.          | 23.6                                 | 4.31                                                               | 77.1                                                            | 9.1                               | 8.2                               | 1.1              | 112                                         |
| PG16 | -14                                       | 6           | i.p.          | 37.8                                 | 4.69                                                               | 73.5                                                            | 10.3                              | 9.5                               | 1.1              | 257                                         |
| PG16 | -14                                       | 7           | i.p.          | 49.5                                 | 4.71                                                               | 74.7                                                            | 11.7                              | 8.5                               | 1.4              | 107                                         |
| PG16 | -7                                        | 8           | i.p.          | 32.3                                 | 4.23                                                               | 76.1                                                            | 10.1                              | 8.4                               | 1.2              | 139                                         |
| PG16 | -7                                        | 9           | i.p.          | 18.6                                 | 3.79                                                               | 69.5                                                            | 11.7                              | 9.8                               | 1.2              | 50                                          |
| PG16 | -7                                        | 10          | i.p.          | 138.2                                | 4.60                                                               | 63.8                                                            | 13.4                              | 13.9                              | 1.0              | 28                                          |
| PG16 | -7                                        | 11          | i.p.          | 0.0                                  | 3.02                                                               | 49.3                                                            | 2.6                               | 4.4                               | 0.6              | 7                                           |
| PG16 | -7                                        | 12          | i.p.          | 174.9                                | 4.53                                                               | 70.9                                                            | 12.6                              | 9.0                               | 1.4              | 79                                          |
| PG16 | -7                                        | 13          | i.p.          | 6.3                                  | 3.71                                                               | 73.6                                                            | 11.0                              | 8.4                               | 1.3              | 117                                         |
| PG16 | -7                                        | 14          | i.p.          | 29.0                                 | 4.21                                                               | 25.5                                                            | 2.9                               | 3.7                               | 0.8              | 254                                         |
| PG16 | -1                                        | 15          | i.p.          | 0.0                                  | 2.22                                                               | 80.5                                                            | 6.2                               | 7.9                               | 0.8              | 93                                          |
| PG16 | -1                                        | 16          | i.p.          | 40.8                                 | 4.41                                                               | 34.8                                                            | 5.1                               | 7.2                               | 0.7              | 97                                          |
| PG16 | -1                                        | 17          | i.p.          | 24.4                                 | 3.99                                                               | 73.7                                                            | 10.4                              | 8.9                               | 1.2              | 75                                          |
| PG16 | -1                                        | 18          | i.p.          | 0.0                                  | 3.01                                                               | 57.9                                                            | 15.9                              | 18.1                              | 0.9              | 45                                          |
| PG16 | -1                                        | 19          | i.p.          | 0.0                                  | 2.08                                                               | 73.2                                                            | 11.6                              | 9.6                               | 1.2              | 63                                          |
| PG16 | -1                                        | 20          | i.p.          | 0.0                                  | 3.17                                                               | 80.1                                                            | 7.3                               | 7.5                               | 1.0              | 134                                         |
| PG16 | -1                                        | 21          | i.p.          | 0.0                                  | 3.05                                                               | 76.9                                                            | 8.9                               | 7.3                               | 1.2              | 132                                         |
| NA   | Mock-infected                             | 29          | NA            | 0.0                                  | <1.48                                                              | 75.0                                                            | 8.7                               | 6.9                               | 1.3              | 101                                         |
| NA   | Mock-infected                             | 30          | NA            | 0.0                                  | <1.48                                                              | 81.2                                                            | 7.4                               | 6.8                               | 1.1              | 178                                         |
| NA   | Mock-infected                             | 31          | NA            | 0.0                                  | <1.48                                                              | 79.5                                                            | 7.1                               | 6.1                               | 1.2              | 181                                         |
| NA   | Mock-infected                             | 32          | NA            | 0.0                                  | <1.48                                                              | 79.3                                                            | 7.6                               | 6.6                               | 1.2              | 201                                         |
| NA   | Mock-infected                             | 33          | NA            | 0.0                                  | <1.48                                                              | 77.7                                                            | 8.4                               | 8.3                               | 1.0              | 69                                          |

NA: Not applicable

**Supplementary Table 4.** Data for individual mice in Figure 3A (cohort generated with tissues from donor D).

| Drug    | Drug dose (µg/dose) | Mouse ID | Drug route | p24 (pg/10 <sup>6</sup> cells) | HIV RNA (log <sub>10</sub> copies/10 <sup>6</sup> cells) | Thy/Liv Implant Cells                                 |                         |                         |               | Total cell yield (x 10 <sup>6</sup> ) |
|---------|---------------------|----------|------------|--------------------------------|----------------------------------------------------------|-------------------------------------------------------|-------------------------|-------------------------|---------------|---------------------------------------|
|         |                     |          |            |                                |                                                          | CD4 <sup>+</sup> CD8 <sup>+</sup> Double-positive (%) | CD4 Single-positive (%) | CD8 Single-positive (%) | CD4/CD8 ratio |                                       |
| NA      | Untreated           | 43       | NA         | 898.9                          | 5.23                                                     | 81.5                                                  | 5.3                     | 7.2                     | 0.7           | 88                                    |
| NA      | Untreated           | 44       | NA         | 599.0                          | 4.73                                                     | 79.8                                                  | 6.9                     | 6.5                     | 1.1           | 65                                    |
| NA      | Untreated           | 45       | NA         | 725.9                          | 5.74                                                     | 78.3                                                  | 7.6                     | 7.5                     | 1.0           | 30                                    |
| NA      | Untreated           | 46       | NA         | 6.4                            | 3.58                                                     | 87.9                                                  | 5.9                     | 2.6                     | 2.3           | 76                                    |
| NA      | Untreated           | 47       | NA         | 397.4                          | 5.00                                                     | 83.5                                                  | 6.1                     | 5.4                     | 1.1           | 75                                    |
| NA      | Untreated           | 48       | NA         | 1290.6                         | 6.36                                                     | 74.8                                                  | 5.5                     | 12.2                    | 0.5           | 43                                    |
| NA      | Untreated           | 49       | NA         | 472.0                          | 5.26                                                     | 82.2                                                  | 5.2                     | 6.9                     | 0.7           | 79                                    |
| Isotype | 500                 | 29       | i.p.       | 380.3                          | 4.85                                                     | 83.5                                                  | 6.1                     | 5.0                     | 1.2           | 62                                    |
| Isotype | 500                 | 30       | i.p.       | 722.9                          | 5.36                                                     | 80.3                                                  | 5.1                     | 8.0                     | 0.6           | 33                                    |
| Isotype | 500                 | 31*      | i.p.       | ND                             | ND                                                       | ND                                                    | ND                      | ND                      | ND            | ND                                    |
| Isotype | 500                 | 32       | i.p.       | 1461.6                         | 6.64                                                     | 67.5                                                  | 7.6                     | 14.9                    | 0.5           | 12                                    |
| Isotype | 500                 | 33*      | i.p.       | ND                             | ND                                                       | ND                                                    | ND                      | ND                      | ND            | ND                                    |
| Isotype | 500                 | 34       | i.p.       | 933.3                          | 5.98                                                     | 80.4                                                  | 4.9                     | 8.4                     | 0.6           | 44                                    |
| Isotype | 500                 | 35       | i.p.       | 850.3                          | 5.52                                                     | 78.8                                                  | 4.7                     | 9.0                     | 0.5           | 15                                    |
| PG16    | 50                  | 22       | i.p.       | 0.0                            | 1.98                                                     | 79.7                                                  | 8.1                     | 2.6                     | 3.1           | 135                                   |
| PG16    | 50                  | 23       | i.p.       | 0.0                            | 1.93                                                     | 86.9                                                  | 4.4                     | 4.3                     | 1.0           | 75                                    |
| PG16    | 50                  | 24*      | i.p.       | ND                             | ND                                                       | ND                                                    | ND                      | ND                      | ND            | ND                                    |
| PG16    | 50                  | 25       | i.p.       | 0.0                            | 1.90                                                     | 85.3                                                  | 6.4                     | 4.4                     | 1.5           | 100                                   |
| PG16    | 50                  | 26       | i.p.       | 0.0                            | 3.53                                                     | 82.5                                                  | 8.3                     | 3.9                     | 2.1           | 158                                   |
| PG16    | 50                  | 27       | i.p.       | 0.0                            | 1.91                                                     | 87.2                                                  | 6.1                     | 3.3                     | 1.9           | 128                                   |
| PG16    | 50                  | 28       | i.p.       | 0.0                            | 2.44                                                     | 81.0                                                  | 9.1                     | 5.6                     | 1.6           | 17                                    |
| PG16    | 150                 | 15       | i.p.       | 0.0                            | 1.78                                                     | 83.6                                                  | 8.2                     | 4.9                     | 1.7           | 131                                   |
| PG16    | 150                 | 16       | i.p.       | 0.0                            | 1.87                                                     | 35.9                                                  | 4.7                     | 3.0                     | 1.6           | 84                                    |
| PG16    | 150                 | 17       | i.p.       | 0.0                            | 1.80                                                     | 82.3                                                  | 8.4                     | 5.4                     | 1.6           | 55                                    |
| PG16    | 150                 | 18       | i.p.       | 0.0                            | 2.05                                                     | 79.3                                                  | 11.7                    | 5.5                     | 2.1           | 24                                    |
| PG16    | 150                 | 19       | i.p.       | 0.0                            | 1.61                                                     | 78.9                                                  | 11.2                    | 4.7                     | 2.4           | 76                                    |
| PG16    | 150                 | 20       | i.p.       | 0.0                            | 1.83                                                     | 87.1                                                  | 6.6                     | 3.0                     | 2.2           | 26                                    |
| PG16    | 150                 | 21       | i.p.       | 0.0                            | 1.86                                                     | 85.8                                                  | 7.7                     | 3.6                     | 2.1           | 119                                   |
| PG16    | 500                 | 8        | i.p.       | 0.0                            | 1.90                                                     | 30.6                                                  | 4.5                     | 1.9                     | 2.4           | 180                                   |
| PG16    | 500                 | 9        | i.p.       | 0.0                            | 1.62                                                     | 82.6                                                  | 8.5                     | 5.6                     | 1.5           | 68                                    |
| PG16    | 500                 | 10       | i.p.       | 0.0                            | 1.69                                                     | 84.1                                                  | 7.6                     | 4.3                     | 1.8           | 219                                   |
| PG16    | 500                 | 11       | i.p.       | 0.0                            | 1.82                                                     | 86.7                                                  | 6.2                     | 4.6                     | 1.3           | 36                                    |
| PG16    | 500                 | 12       | i.p.       | 0.0                            | 1.85                                                     | 84.0                                                  | 7.4                     | 4.8                     | 1.6           | 146                                   |
| PG16    | 500                 | 13       | i.p.       | 0.0                            | 1.70                                                     | 82.7                                                  | 6.9                     | 5.0                     | 1.4           | 134                                   |
| PG16    | 500                 | 14       | i.p.       | 0.0                            | 2.66                                                     | 76.5                                                  | 7.3                     | 4.6                     | 1.6           | 8                                     |
| PG9     | 500                 | 1        | i.p.       | 0.0                            | 1.77                                                     | 83.9                                                  | 7.6                     | 4.8                     | 1.6           | 73                                    |
| PG9     | 500                 | 2        | i.p.       | 0.0                            | 1.80                                                     | 86.1                                                  | 5.7                     | 4.3                     | 1.3           | 39                                    |
| PG9     | 500                 | 3        | i.p.       | 0.0                            | 3.19                                                     | 85.6                                                  | 6.2                     | 4.0                     | 1.6           | 13                                    |
| PG9     | 500                 | 4        | i.p.       | 38.3                           | 3.73                                                     | 85.0                                                  | 6.2                     | 4.8                     | 1.3           | 151                                   |
| PG9     | 500                 | 5        | i.p.       | 42.4                           | 3.92                                                     | 85.5                                                  | 6.3                     | 4.2                     | 1.5           | 29                                    |
| PG9     | 500                 | 6        | i.p.       | 0.0                            | 2.13                                                     | 84.4                                                  | 7.2                     | 4.2                     | 1.7           | 167                                   |
| PG9     | 500                 | 7        | i.p.       | 0.0                            | 1.64                                                     | 82.4                                                  | 7.2                     | 5.0                     | 1.5           | 199                                   |
| 3TC     | 30 mg/kg/day        | 36       | i.p.       | 0.0                            | 3.04                                                     | 88.4                                                  | 5.0                     | 3.3                     | 1.5           | 44                                    |
| 3TC     | 30 mg/kg/day        | 37       | i.p.       | 0.0                            | 2.03                                                     | 85.3                                                  | 6.4                     | 3.5                     | 1.8           | 134                                   |
| 3TC     | 30 mg/kg/day        | 38       | i.p.       | 0.0                            | 3.55                                                     | 86.7                                                  | 6.4                     | 3.1                     | 2.1           | 71                                    |
| 3TC     | 30 mg/kg/day        | 39       | i.p.       | 0.0                            | 1.52                                                     | 86.6                                                  | 5.4                     | 4.0                     | 1.3           | 43                                    |
| 3TC     | 30 mg/kg/day        | 40       | i.p.       | 0.0                            | 2.05                                                     | 86.9                                                  | 6.0                     | 4.0                     | 1.5           | 213                                   |
| 3TC     | 30 mg/kg/day        | 41       | i.p.       | 28.9                           | 3.36                                                     | 85.0                                                  | 7.3                     | 4.1                     | 1.8           | 32                                    |
| 3TC     | 30 mg/kg/day        | 42       | i.p.       | 0.0                            | 2.52                                                     | 87.7                                                  | 5.0                     | 3.7                     | 1.3           | 57                                    |
| NA      | Mock-infected       | 50       | NA         | 0.0                            | <2.18                                                    | 70.6                                                  | 4.7                     | 9.2                     | 0.5           | 4                                     |
| NA      | Mock-infected       | 51       | NA         | 0.0                            | <1.48                                                    | 85.3                                                  | 5.6                     | 4.2                     | 1.3           | 69                                    |
| NA      | Mock-infected       | 52       | NA         | 0.0                            | <1.48                                                    | 87.5                                                  | 6.3                     | 3.4                     | 1.9           | 111                                   |
| NA      | Mock-infected       | 53       | NA         | 0.0                            | <1.48                                                    | 86.3                                                  | 6.3                     | 3.0                     | 2.1           | 168                                   |
| NA      | Mock-infected       | 54       | NA         | 0.0                            | <1.48                                                    | 87.5                                                  | 5.8                     | 2.9                     | 2.0           | 124                                   |

NA: Not applicable

ND: Not determined

\* mouse died

**Supplementary Table 5.** Data for individual mice in Figure 3B (cohort generated with tissues from donor E).

| Drug | Drug dose (µg/dose) | Mouse ID | Drug route | p24 (pg/10 <sup>6</sup> cells) | HIV RNA (log <sub>10</sub> copies/10 <sup>6</sup> cells) | Thy/Liv Implant Cells                                 |                         |                         |               | Total cell yield (x 10 <sup>6</sup> ) |
|------|---------------------|----------|------------|--------------------------------|----------------------------------------------------------|-------------------------------------------------------|-------------------------|-------------------------|---------------|---------------------------------------|
|      |                     |          |            |                                |                                                          | CD4 <sup>+</sup> CD8 <sup>+</sup> Double-positive (%) | CD4 Single-positive (%) | CD8 Single-positive (%) | CD4/CD8 ratio |                                       |
| NA   | Untreated           | 36       | NA         | 1242.1                         | 6.22                                                     | 73.7                                                  | 7.0                     | 8.9                     | 0.8           | 57                                    |
| NA   | Untreated           | 37       | NA         | 1315.5                         | 5.92                                                     | 79.0                                                  | 7.6                     | 6.8                     | 1.1           | 661                                   |
| NA   | Untreated           | 38       | NA         | 1094.7                         | 6.05                                                     | 75.4                                                  | 5.3                     | 6.8                     | 0.8           | 469                                   |
| NA   | Untreated           | 39       | NA         | 752.9                          | 6.05                                                     | 68.4                                                  | 5.2                     | 15.4                    | 0.3           | 132                                   |
| NA   | Untreated           | 40       | NA         | 1048.5                         | 6.09                                                     | 48.3                                                  | 4.4                     | 6.0                     | 0.7           | 164                                   |
| NA   | Untreated           | 41       | NA         | 702.2                          | 6.60                                                     | 74.6                                                  | 5.5                     | 11.1                    | 0.5           | 79                                    |
| NA   | Untreated           | 42       | NA         | 50.7                           | 4.25                                                     | 85.2                                                  | 5.8                     | 4.2                     | 1.4           | 378                                   |
| PG16 | 1.5                 | 25       | i.p.       | 10.3                           | 4.05                                                     | 83.4                                                  | 7.4                     | 4.1                     | 1.8           | 798                                   |
| PG16 | 1.5                 | 26       | i.p.       | 0.0                            | 2.19                                                     | 81.5                                                  | 6.5                     | 4.1                     | 1.6           | 732                                   |
| PG16 | 1.5                 | 27       | i.p.       | 0.0                            | 2.95                                                     | 80.1                                                  | 6.2                     | 3.4                     | 1.8           | 391                                   |
| PG16 | 1.5                 | 28       | i.p.       | 0.0                            | 2.50                                                     | 3.1                                                   | 8.8                     | 12.9                    | 0.7           | 8                                     |
| PG16 | 1.5                 | 29       | i.p.       | 0.0                            | 2.62                                                     | 81.8                                                  | 8.0                     | 4.0                     | 2.0           | 428                                   |
| PG16 | 1.5                 | 30       | i.p.       | 0.0                            | 1.67                                                     | 65.1                                                  | 4.4                     | 3.4                     | 1.3           | 424                                   |
| PG16 | 5                   | 19       | i.p.       | 0.0                            | <1.48                                                    | 80.9                                                  | 9.7                     | 5.2                     | 1.9           | 171                                   |
| PG16 | 5                   | 20       | i.p.       | 0.0                            | 3.74                                                     | 77.5                                                  | 7.6                     | 5.2                     | 1.5           | 913                                   |
| PG16 | 5                   | 21       | i.p.       | 0.0                            | 3.45                                                     | 83.0                                                  | 6.9                     | 3.9                     | 1.8           | 214                                   |
| PG16 | 5                   | 22       | i.p.       | 0.0                            | 2.27                                                     | 77.9                                                  | 10.8                    | 5.3                     | 2.1           | 483                                   |
| PG16 | 5                   | 23       | i.p.       | 0.0                            | 2.88                                                     | 84.2                                                  | 6.5                     | 3.8                     | 1.7           | 474                                   |
| PG16 | 5                   | 24       | i.p.       | 0.0                            | 2.12                                                     | 81.4                                                  | 7.1                     | 5.0                     | 1.4           | 691                                   |
| PG16 | 15                  | 13       | i.p.       | 0.0                            | 2.86                                                     | 83.9                                                  | 7.4                     | 4.0                     | 1.9           | 513                                   |
| PG16 | 15                  | 14       | i.p.       | 0.0                            | 2.20                                                     | 86.0                                                  | 6.4                     | 3.5                     | 1.8           | 797                                   |
| PG16 | 15                  | 15       | i.p.       | 0.0                            | 2.33                                                     | 37.5                                                  | 2.4                     | 1.9                     | 1.3           | 594                                   |
| PG16 | 15                  | 16       | i.p.       | 0.0                            | <1.48                                                    | 6.1                                                   | 0.4                     | 0.4                     | 1.2           | 568                                   |
| PG16 | 15                  | 17       | i.p.       | 0.0                            | 1.82                                                     | 84.3                                                  | 7.0                     | 4.7                     | 1.5           | 93                                    |
| PG16 | 15                  | 18       | i.p.       | 0.0                            | 3.54                                                     | 86.8                                                  | 5.8                     | 4.1                     | 1.4           | 141                                   |
| PG16 | 50                  | 7        | i.p.       | 0.0                            | <1.48                                                    | 80.8                                                  | 6.0                     | 3.9                     | 1.5           | 217                                   |
| PG16 | 50                  | 8        | i.p.       | 0.0                            | <1.48                                                    | 76.8                                                  | 8.8                     | 4.4                     | 2.0           | 1197                                  |
| PG16 | 50                  | 9        | i.p.       | 0.0                            | <1.48                                                    | 79.9                                                  | 8.7                     | 4.2                     | 2.0           | 763                                   |
| PG16 | 50                  | 10       | i.p.       | 0.0                            | 3.29                                                     | 71.2                                                  | 14.8                    | 6.1                     | 2.4           | 1295                                  |
| PG16 | 50                  | 11       | i.p.       | 0.0                            | 2.81                                                     | 76.8                                                  | 12.2                    | 4.5                     | 2.7           | 161                                   |
| PG16 | 50                  | 12       | i.p.       | 0.0                            | <1.48                                                    | 80.7                                                  | 9.0                     | 5.0                     | 1.8           | 537                                   |
| PG16 | 150                 | 1        | i.p.       | 0.0                            | 2.22                                                     | 87.7                                                  | 5.4                     | 3.1                     | 1.7           | 257                                   |
| PG16 | 150                 | 2        | i.p.       | 0.0                            | 3.26                                                     | 83.0                                                  | 7.1                     | 4.4                     | 1.6           | 88                                    |
| PG16 | 150                 | 3        | i.p.       | 0.0                            | 1.58                                                     | 85.1                                                  | 6.8                     | 3.6                     | 1.9           | 1831                                  |
| PG16 | 150                 | 4        | i.p.       | 0.0                            | 1.79                                                     | 87.9                                                  | 5.9                     | 3.3                     | 1.8           | 257                                   |
| PG16 | 150                 | 5        | i.p.       | 0.0                            | <1.48                                                    | 80.7                                                  | 6.0                     | 4.4                     | 1.4           | 569                                   |
| PG16 | 150                 | 6        | i.p.       | 0.0                            | <1.48                                                    | 82.7                                                  | 7.9                     | 4.3                     | 1.9           | 621                                   |
| 3TC  | 30 mg/kg/day        | 31       | i.p.       | 174.7                          | 4.96                                                     | 80.8                                                  | 8.3                     | 4.0                     | 2.1           | 221                                   |
| 3TC  | 30 mg/kg/day        | 32       | i.p.       | 44.9                           | 3.63                                                     | 19.8                                                  | 1.9                     | 1.7                     | 1.1           | 386                                   |
| 3TC  | 30 mg/kg/day        | 33       | i.p.       | 0.0                            | 3.59                                                     | 85.9                                                  | 6.7                     | 2.8                     | 2.4           | 406                                   |
| 3TC  | 30 mg/kg/day        | 34       | i.p.       | 12.4                           | 4.05                                                     | 86.2                                                  | 6.8                     | 3.4                     | 2.0           | 448                                   |
| 3TC  | 30 mg/kg/day        | 35       | i.p.       | 16.2                           | 3.59                                                     | 38.8                                                  | 4.6                     | 5.3                     | 0.9           | 67                                    |
| NA   | Mock-infected       | 43       | NA         | 0.0                            | <1.48                                                    | 86.0                                                  | 6.3                     | 3.4                     | 1.8           | 597                                   |
| NA   | Mock-infected       | 44       | NA         | 0.0                            | <1.48                                                    | 85.0                                                  | 6.8                     | 3.7                     | 1.8           | 945                                   |
| NA   | Mock-infected       | 45       | NA         | 0.0                            | <1.48                                                    | 85.8                                                  | 6.5                     | 4.0                     | 1.6           | 572                                   |
| NA   | Mock-infected       | 46       | NA         | 0.0                            | <1.48                                                    | 80.5                                                  | 6.6                     | 3.9                     | 1.7           | 795                                   |
| NA   | Mock-infected       | 47       | NA         | 0.0                            | <1.48                                                    | 77.9                                                  | 6.1                     | 4.5                     | 1.4           | 831                                   |
| NA   | Mock-infected       | 48       | NA         | 0.0                            | <1.48                                                    | 42.3                                                  | 2.7                     | 2.0                     | 1.3           | 417                                   |

NA: Not applicable

**Supplementary Table 6.** Data for individual mice in Figure 3C (cohort generated with tissues from donor F).

| Drug | Drug dose (µg/dose) | Mouse ID        | Drug route | p24 (pg/10 <sup>6</sup> cells) | HIV RNA (log <sub>10</sub> copies/10 <sup>6</sup> cells) | Thy/Liv Implant Cells                                 |                         |                         |               | Total cell yield (x 10 <sup>6</sup> ) |
|------|---------------------|-----------------|------------|--------------------------------|----------------------------------------------------------|-------------------------------------------------------|-------------------------|-------------------------|---------------|---------------------------------------|
|      |                     |                 |            |                                |                                                          | CD4 <sup>+</sup> CD8 <sup>+</sup> Double-positive (%) | CD4 Single-positive (%) | CD8 Single-positive (%) | CD4/CD8 ratio |                                       |
| NA   | Untreated           | 42              | NA         | 389.9                          | 5.14                                                     | 72.1                                                  | 7.2                     | 6.9                     | 1.0           | 287                                   |
| NA   | Untreated           | 43              | NA         | 125.5                          | 4.42                                                     | 83.0                                                  | 5.7                     | 4.4                     | 1.3           | 189                                   |
| NA   | Untreated           | 44              | NA         | 123.1                          | 4.53                                                     | 83.2                                                  | 5.9                     | 5.9                     | 1.0           | 49                                    |
| NA   | Untreated           | 45              | NA         | 219.2                          | 4.51                                                     | 78.1                                                  | 4.7                     | 6.7                     | 0.7           | 24                                    |
| NA   | Untreated           | 46              | NA         | 413.9                          | 5.33                                                     | 79.2                                                  | 5.1                     | 8.2                     | 0.6           | 27                                    |
| NA   | Untreated           | 47              | NA         | 68.4                           | 4.90                                                     | 80.2                                                  | 7.5                     | 5.9                     | 1.3           | 302                                   |
| NA   | Untreated           | 48              | NA         | 250.6                          | 4.55                                                     | 79.7                                                  | 7.6                     | 5.9                     | 1.3           | 236                                   |
| PG16 | 0.05                | 31 <sup>†</sup> | i.p.       | ND                             | ND                                                       | ND                                                    | ND                      | ND                      | ND            | ND                                    |
| PG16 | 0.05                | 32              | i.p.       | 110.4                          | 4.19                                                     | 76.7                                                  | 7.6                     | 5.9                     | 1.3           | 182                                   |
| PG16 | 0.05                | 33              | i.p.       | 116.0                          | 4.24                                                     | 78.1                                                  | 6.4                     | 6.2                     | 1.0           | 133                                   |
| PG16 | 0.05                | 34 <sup>†</sup> | i.p.       | ND                             | ND                                                       | ND                                                    | ND                      | ND                      | ND            | ND                                    |
| PG16 | 0.05                | 35              | i.p.       | 44.3                           | 4.77                                                     | 85.7                                                  | 5.9                     | 3.8                     | 1.6           | 66                                    |
| PG16 | 0.05                | 36 <sup>†</sup> | i.p.       | ND                             | ND                                                       | ND                                                    | ND                      | ND                      | ND            | ND                                    |
| PG16 | 0.15                | 25              | i.p.       | 307.9                          | 4.59                                                     | 79.5                                                  | 7.2                     | 8.4                     | 0.9           | 138                                   |
| PG16 | 0.15                | 26              | i.p.       | 193.3                          | 4.80                                                     | 73.2                                                  | 9.3                     | 8.9                     | 1.0           | 41                                    |
| PG16 | 0.15                | 27              | i.p.       | 17.9                           | 4.32                                                     | 76.5                                                  | 8.7                     | 6.8                     | 1.3           | 19                                    |
| PG16 | 0.15                | 28              | i.p.       | 649.2                          | 5.17                                                     | 53.8                                                  | 5.4                     | 4.2                     | 1.3           | 337                                   |
| PG16 | 0.15                | 29              | i.p.       | 263.2                          | 4.52                                                     | 81.6                                                  | 7.6                     | 6.2                     | 1.2           | 114                                   |
| PG16 | 0.15                | 30              | i.p.       | 169.8                          | 4.48                                                     | 80.5                                                  | 6.9                     | 5.8                     | 1.2           | 220                                   |
| PG16 | 0.5                 | 19              | i.p.       | 25.6                           | 4.48                                                     | 84.0                                                  | 6.9                     | 4.1                     | 1.7           | 27                                    |
| PG16 | 0.5                 | 20              | i.p.       | 9.9                            | 4.05                                                     | 80.4                                                  | 8.4                     | 5.8                     | 1.4           | 43                                    |
| PG16 | 0.5                 | 21              | i.p.       | 0.0                            | 3.60                                                     | 76.9                                                  | 11.0                    | 6.1                     | 1.8           | 74                                    |
| PG16 | 0.5                 | 22              | i.p.       | 0.0                            | 4.02                                                     | 81.0                                                  | 8.0                     | 4.9                     | 1.6           | 158                                   |
| PG16 | 0.5                 | 23              | i.p.       | 0.0                            | 4.16                                                     | 78.9                                                  | 9.7                     | 5.8                     | 1.7           | 110                                   |
| PG16 | 0.5                 | 24 <sup>†</sup> | i.p.       | ND                             | ND                                                       | ND                                                    | ND                      | ND                      | ND            | ND                                    |
| PG16 | 1.5                 | 13              | i.p.       | 0.0                            | 2.09                                                     | 84.5                                                  | 7.1                     | 4.1                     | 1.7           | 50                                    |
| PG16 | 1.5                 | 14              | i.p.       | 0.0                            | <1.48                                                    | 83.9                                                  | 7.6                     | 3.7                     | 2.1           | 266                                   |
| PG16 | 1.5                 | 15              | i.p.       | 0.0                            | 1.74                                                     | 78.7                                                  | 9.0                     | 5.3                     | 1.7           | 211                                   |
| PG16 | 1.5                 | 16              | i.p.       | 0.0                            | 1.66                                                     | 78.7                                                  | 10.1                    | 5.5                     | 1.8           | 191                                   |
| PG16 | 1.5                 | 17              | i.p.       | 0.0                            | 1.93                                                     | 68.6                                                  | 15.7                    | 12.3                    | 1.3           | 24                                    |
| PG16 | 1.5                 | 18              | i.p.       | 0.0                            | 3.24                                                     | 78.7                                                  | 9.1                     | 5.2                     | 1.7           | 114                                   |
| PG16 | 5.0                 | 7               | i.p.       | 0.0                            | <1.48                                                    | 86.7                                                  | 5.4                     | 3.6                     | 1.5           | 67                                    |
| PG16 | 5.0                 | 8               | i.p.       | 0.0                            | 2.04                                                     | 77.7                                                  | 8.7                     | 5.1                     | 1.7           | 25                                    |
| PG16 | 5.0                 | 9               | i.p.       | 0.0                            | 2.78                                                     | 82.4                                                  | 7.2                     | 4.8                     | 1.5           | 219                                   |
| PG16 | 5.0                 | 10              | i.p.       | 0.0                            | <1.48                                                    | 81.0                                                  | 7.7                     | 5.3                     | 1.5           | 183                                   |
| PG16 | 5.0                 | 11 <sup>†</sup> | i.p.       | ND                             | ND                                                       | ND                                                    | ND                      | ND                      | ND            | ND                                    |
| PG16 | 5.0                 | 12              | i.p.       | 0.0                            | <1.48                                                    | 83.3                                                  | 6.1                     | 3.5                     | 1.8           | 328                                   |
| PG16 | 5.0, once           | 1               | i.p.       | 0.0                            | <1.48                                                    | 76.7                                                  | 10.3                    | 5.3                     | 2.0           | 176                                   |
| PG16 | 5.0, once           | 2               | i.p.       | 0.0                            | 1.99                                                     | 76.7                                                  | 11.5                    | 5.2                     | 2.2           | 320                                   |
| PG16 | 5.0, once           | 3               | i.p.       | 0.0                            | 1.85                                                     | 69.9                                                  | 8.1                     | 5.1                     | 1.6           | 11                                    |
| PG16 | 5.0, once           | 4               | i.p.       | 0.0                            | <1.78                                                    | 85.3                                                  | 5.8                     | 4.8                     | 1.2           | 22                                    |
| PG16 | 5.0, once           | 5               | i.p.       | 0.0                            | 1.51                                                     | 84.0                                                  | 7.3                     | 4.1                     | 1.8           | 127                                   |
| PG16 | 5.0, once           | 6               | i.p.       | 0.0                            | <1.48                                                    | 83.7                                                  | 6.3                     | 3.6                     | 1.8           | 50                                    |
| 3TC  | 30 mg/kg/day        | 37              | i.p.       | 0.0                            | 3.63                                                     | 81.0                                                  | 9.1                     | 5.1                     | 1.8           | 54                                    |
| 3TC  | 30 mg/kg/day        | 38              | i.p.       | 0.0                            | 2.08                                                     | 82.7                                                  | 7.3                     | 4.5                     | 1.6           | 30                                    |
| 3TC  | 30 mg/kg/day        | 39              | i.p.       | 0.0                            | 2.44                                                     | 79.5                                                  | 8.4                     | 4.9                     | 1.7           | 235                                   |
| 3TC  | 30 mg/kg/day        | 40              | i.p.       | 0.0                            | 2.20                                                     | 83.3                                                  | 6.7                     | 4.5                     | 1.5           | 164                                   |
| 3TC  | 30 mg/kg/day        | 41              | i.p.       | 0.0                            | 2.57                                                     | 84.6                                                  | 6.7                     | 3.2                     | 2.1           | 138                                   |
| NA   | Mock-infected       | 49              | NA         | 0.0                            | <1.48                                                    | 79.9                                                  | 9.9                     | 4.9                     | 2.0           | 164                                   |
| NA   | Mock-infected       | 50              | NA         | 0.0                            | <1.48                                                    | 62.0                                                  | 4.8                     | 3.2                     | 1.5           | 140                                   |
| NA   | Mock-infected       | 51 <sup>†</sup> | NA         | ND                             | ND                                                       | ND                                                    | ND                      | ND                      | ND            | ND                                    |
| NA   | Mock-infected       | 52*             | NA         | ND                             | ND                                                       | ND                                                    | ND                      | ND                      | ND            | ND                                    |
| NA   | Mock-infected       | 53              | NA         | 0.0                            | <2.18                                                    | 66.5                                                  | 7.2                     | 4.2                     | 1.7           | 11                                    |
| NA   | Mock-infected       | 54              | NA         | 0.0                            | <1.48                                                    | 85.8                                                  | 6.5                     | 3.6                     | 1.8           | 91                                    |

NA: Not applicable

ND: Not determined

\* mouse died

† abnormal implant

**Supplementary Table 7.** Data for individual mice in Figure 4A (cohort generated with tissues from donor G).

| Drug | Drug dose (µg/dose) | Mouse ID        | Drug route | p24 (pg/10 <sup>6</sup> cells) | HIV RNA (log <sub>10</sub> copies/10 <sup>6</sup> cells) | Thy/Liv Implant Cells                                 |                         |                         |               | Total cell yield (x 10 <sup>6</sup> ) |
|------|---------------------|-----------------|------------|--------------------------------|----------------------------------------------------------|-------------------------------------------------------|-------------------------|-------------------------|---------------|---------------------------------------|
|      |                     |                 |            |                                |                                                          | CD4 <sup>+</sup> CD8 <sup>+</sup> Double-positive (%) | CD4 Single-positive (%) | CD8 Single-positive (%) | CD4/CD8 ratio |                                       |
| NA   | Untreated           | 28              | NA         | 1953.6                         | 6.61                                                     | 42.9                                                  | 27.7                    | 15.1                    | 1.8           | 23                                    |
| NA   | Untreated           | 29              | NA         | 4267.4                         | 6.66                                                     | 17.0                                                  | 34.4                    | 22.7                    | 1.5           | 18                                    |
| NA   | Untreated           | 30              | NA         | 1924.9                         | 6.76                                                     | 56.9                                                  | 19.6                    | 10.7                    | 1.8           | 39                                    |
| NA   | Untreated           | 31              | NA         | 1949.1                         | 6.75                                                     | 67.8                                                  | 11.5                    | 8.7                     | 1.3           | 25                                    |
| NA   | Untreated           | 32*             | NA         | ND                             | ND                                                       | ND                                                    | ND                      | ND                      | ND            | ND                                    |
| NA   | Untreated           | 33              | NA         | 0.0                            | 3.38                                                     | 59.2                                                  | 8.8                     | 5.1                     | 1.7           | 83                                    |
| NA   | Untreated           | 34              | NA         | 3080.3                         | 6.59                                                     | 17.5                                                  | 34.5                    | 21.8                    | 1.6           | 17                                    |
| PG16 | 50                  | 15              | i.p.       | 702.1                          | 5.87                                                     | 4.3                                                   | 40.1                    | 31.1                    | 1.3           | 9                                     |
| PG16 | 50                  | 16              | i.p.       | 960.3                          | 6.66                                                     | 65.5                                                  | 14.4                    | 9.5                     | 1.5           | 15                                    |
| PG16 | 50                  | 17              | i.p.       | 847.0                          | 5.84                                                     | 47.0                                                  | 23.2                    | 15.5                    | 1.5           | 17                                    |
| PG16 | 50                  | 18              | i.p.       | 731.2                          | 5.75                                                     | 12.2                                                  | 49.1                    | 21.9                    | 2.2           | 15                                    |
| PG16 | 50                  | 19              | i.p.       | 380.9                          | 4.97                                                     | 75.2                                                  | 10.9                    | 6.7                     | 1.6           | 105                                   |
| PG16 | 50                  | 20              | i.p.       | 480.5                          | 5.34                                                     | 6.1                                                   | 45.2                    | 25.2                    | 1.8           | 19                                    |
| PG16 | 50                  | 21              | i.p.       | 939.4                          | 6.00                                                     | 40.2                                                  | 28.6                    | 16.5                    | 1.7           | 40                                    |
| PG16 | 150                 | 8               | i.p.       | 487.0                          | 5.46                                                     | 66.5                                                  | 16.4                    | 7.8                     | 2.1           | 23                                    |
| PG16 | 150                 | 9               | i.p.       | 533.8                          | 5.60                                                     | 8.4                                                   | 37.5                    | 17.8                    | 2.1           | 17                                    |
| PG16 | 150                 | 10              | i.p.       | 542.8                          | 5.57                                                     | 20.8                                                  | 43.9                    | 18.1                    | 2.4           | 19                                    |
| PG16 | 150                 | 11 <sup>†</sup> | i.p.       | ND                             | ND                                                       | ND                                                    | ND                      | ND                      | ND            | ND                                    |
| PG16 | 150                 | 12              | i.p.       | 854.2                          | 5.73                                                     | 8.9                                                   | 42.0                    | 23.4                    | 1.8           | 15                                    |
| PG16 | 150                 | 13              | i.p.       | 926.6                          | 6.36                                                     | 7.7                                                   | 46.2                    | 27.5                    | 1.7           | 21                                    |
| PG16 | 150                 | 14              | i.p.       | 504.5                          | 5.56                                                     | 69.8                                                  | 12.4                    | 8.3                     | 1.5           | 33                                    |
| PG16 | 500                 | 1               | i.p.       | 703.2                          | 5.73                                                     | 34.3                                                  | 33.3                    | 16.9                    | 2.0           | 22                                    |
| PG16 | 500                 | 2               | i.p.       | 741.6                          | 6.00                                                     | 3.4                                                   | 46.0                    | 28.5                    | 1.6           | 9                                     |
| PG16 | 500                 | 3               | i.p.       | 1085.6                         | 5.97                                                     | 6.0                                                   | 42.5                    | 26.4                    | 1.6           | 20                                    |
| PG16 | 500                 | 4               | i.p.       | 857.5                          | 5.90                                                     | 35.3                                                  | 24.6                    | 22.9                    | 1.1           | 19                                    |
| PG16 | 500                 | 5               | i.p.       | 862.4                          | 5.78                                                     | 46.0                                                  | 20.1                    | 15.5                    | 1.3           | 11                                    |
| PG16 | 500                 | 6               | i.p.       | 564.1                          | 5.10                                                     | 14.0                                                  | 36.4                    | 23.8                    | 1.5           | 15                                    |
| PG16 | 500                 | 7               | i.p.       | 979.5                          | 5.82                                                     | 7.9                                                   | 40.0                    | 25.6                    | 1.6           | 22                                    |
| 3TC  | 30 mg/kg/day        | 22              | i.p.       | 0.0                            | 3.00                                                     | 78.6                                                  | 9.2                     | 5.5                     | 1.7           | 24                                    |
| 3TC  | 30 mg/kg/day        | 23              | i.p.       | 0.0                            | 2.72                                                     | 84.0                                                  | 4.3                     | 4.8                     | 0.9           | 13                                    |
| 3TC  | 30 mg/kg/day        | 24              | i.p.       | 131.7                          | 4.63                                                     | 50.2                                                  | 6.0                     | 3.9                     | 1.5           | 101                                   |
| 3TC  | 30 mg/kg/day        | 25              | i.p.       | 0.0                            | 3.12                                                     | 83.8                                                  | 7.7                     | 5.3                     | 1.4           | 17                                    |
| 3TC  | 30 mg/kg/day        | 26              | i.p.       | 0.0                            | 2.71                                                     | 81.0                                                  | 7.0                     | 4.6                     | 1.5           | 45                                    |
| 3TC  | 30 mg/kg/day        | 27              | i.p.       | 0.0                            | 3.61                                                     | 81.5                                                  | 5.6                     | 4.3                     | 1.3           | 11                                    |
| PG16 | 500, Mock-infected  | 35              | i.p.       | 0.0                            | <2.18                                                    | 88.9                                                  | 6.2                     | 2.0                     | 3.1           | 7                                     |
| PG16 | 500, Mock-infected  | 36              | i.p.       | 0.0                            | <1.48                                                    | 84.5                                                  | 8.0                     | 2.9                     | 2.7           | 341                                   |
| PG16 | 500, Mock-infected  | 37              | i.p.       | 0.0                            | <1.48                                                    | 86.7                                                  | 6.3                     | 3.1                     | 2.0           | 140                                   |
| PG16 | 500, Mock-infected  | 38              | i.p.       | 0.0                            | <1.48                                                    | 81.8                                                  | 8.6                     | 3.6                     | 2.4           | 58                                    |
| PG16 | 500, Mock-infected  | 39              | i.p.       | ND                             | ND                                                       | 89.6                                                  | 5.1                     | 2.2                     | 2.3           | 107                                   |
| PG16 | 500, Mock-infected  | 40              | i.p.       | 0.0                            | <1.48                                                    | 65.9                                                  | 16.4                    | 9.0                     | 1.8           | 43                                    |
| PG16 | 500, Mock-infected  | 41              | i.p.       | 0.0                            | <1.48                                                    | 88.1                                                  | 5.5                     | 2.5                     | 2.2           | 34                                    |
| NA   | Mock-infected       | 42              | NA         | 0.0                            | <2.18                                                    | 19.4                                                  | 14.8                    | 2.9                     | 5.1           | 13                                    |
| NA   | Mock-infected       | 43              | NA         | 0.0                            | <1.48                                                    | 79.6                                                  | 9.0                     | 3.5                     | 2.6           | 87                                    |
| NA   | Mock-infected       | 44              | NA         | 0.0                            | <1.48                                                    | 85.0                                                  | 8.0                     | 2.7                     | 3.0           | 158                                   |
| NA   | Mock-infected       | 45              | NA         | 0.0                            | <1.48                                                    | 87.6                                                  | 4.8                     | 2.1                     | 2.3           | 81                                    |
| NA   | Mock-infected       | 46              | NA         | 0.0                            | <1.48                                                    | 86.1                                                  | 6.4                     | 3.2                     | 2.0           | 141                                   |
| NA   | Mock-infected       | 47              | NA         | 0.0                            | <1.48                                                    | 67.2                                                  | 5.3                     | 3.9                     | 1.4           | 120                                   |

NA: Not applicable

ND: Not determined

\* mouse died

† abnormal implant



**Supplementary Table 8.** Data for individual mice in Figure 4B (cohort generated with tissues from donor H).

| Drug | Drug dose (µg/dose) | Mouse ID       | Drug route | p24 (pg/10 <sup>6</sup> cells) | HIV RNA (log <sub>10</sub> copies/10 <sup>6</sup> cells) | Thy/Liv Implant Cells                                 |                         |                         |               | Total cell yield (x 10 <sup>6</sup> ) |
|------|---------------------|----------------|------------|--------------------------------|----------------------------------------------------------|-------------------------------------------------------|-------------------------|-------------------------|---------------|---------------------------------------|
|      |                     |                |            |                                |                                                          | CD4 <sup>+</sup> CD8 <sup>+</sup> Double-positive (%) | CD4 Single-positive (%) | CD8 Single-positive (%) | CD4/CD8 ratio |                                       |
| NA   | Untreated           | 27             | NA         | 2288.3                         | 6.45                                                     | 66.1                                                  | 15.0                    | 9.2                     | 1.6           | 80                                    |
| NA   | Untreated           | 28             | NA         | 100.5                          | 5.47                                                     | 72.5                                                  | 14.5                    | 6.6                     | 2.2           | ND                                    |
| NA   | Untreated           | 29             | NA         | 0.0                            | 3.46                                                     | 81.6                                                  | 7.4                     | 4.4                     | 1.7           | 216                                   |
| NA   | Untreated           | 30             | NA         | 1921.3                         | 6.73                                                     | 24.6                                                  | 31.2                    | 23.3                    | 1.3           | 25                                    |
| NA   | Untreated           | 31             | NA         | 2293.3                         | 6.96                                                     | 49.6                                                  | 22.3                    | 15.8                    | 1.4           | 51                                    |
| NA   | Untreated           | 32             | NA         | 2782.9                         | 6.92                                                     | 58.9                                                  | 19.7                    | 11.4                    | 1.7           | 59                                    |
| NA   | Untreated           | 33             | NA         | 2229.7                         | 6.92                                                     | 48.1                                                  | 21.0                    | 16.9                    | 1.2           | 99                                    |
| PG9  | 50                  | 15             | i.p.       | 191.1                          | 4.57                                                     | 75.2                                                  | 11.4                    | 4.8                     | 2.4           | 71                                    |
| PG9  | 50                  | 16             | i.p.       | 75.9                           | 5.04                                                     | 81.7                                                  | 9.2                     | 4.1                     | 2.2           | 99                                    |
| PG9  | 50                  | 17             | i.p.       | 117.4                          | 4.48                                                     | 84.8                                                  | 6.9                     | 4.6                     | 1.5           | 168                                   |
| PG9  | 50                  | 18             | i.p.       | 224.1                          | 4.50                                                     | 65.1                                                  | 17.8                    | 9.1                     | 2.0           | 68                                    |
| PG9  | 50                  | 19             | i.p.       | 153.7                          | 4.38                                                     | 79.3                                                  | 9.9                     | 6.1                     | 1.6           | 135                                   |
| PG9  | 50                  | 20             | i.p.       | 615.4                          | 5.40                                                     | 73.4                                                  | 9.0                     | 5.9                     | 1.5           | 63                                    |
| PG9  | 50                  | 21             | i.p.       | 316.3                          | 5.20                                                     | 73.1                                                  | 8.3                     | 5.7                     | 0.0           | 208                                   |
| PG9  | 150                 | 8              | i.p.       | 74.1                           | 4.33                                                     | 68.2                                                  | 11.9                    | 8.6                     | 1.4           | 16                                    |
| PG9  | 150                 | 9              | i.p.       | 104.4                          | 4.23                                                     | 77.7                                                  | 8.3                     | 5.6                     | 1.5           | 151                                   |
| PG9  | 150                 | 10             | i.p.       | 146.0                          | 4.58                                                     | 76.7                                                  | 8.5                     | 6.0                     | 1.4           | 115                                   |
| PG9  | 150                 | 11             | i.p.       | 157.8                          | 4.47                                                     | 81.6                                                  | 8.4                     | 5.3                     | 1.6           | 318                                   |
| PG9  | 150                 | 12             | i.p.       | 339.8                          | 4.84                                                     | 78.1                                                  | 8.6                     | 6.7                     | 1.3           | 208                                   |
| PG9  | 150                 | 13             | i.p.       | 448.0                          | 5.19                                                     | 82.1                                                  | 7.5                     | 5.9                     | 1.3           | 58                                    |
| PG9  | 150                 | 14             | i.p.       | 872.0                          | 5.78                                                     | 73.7                                                  | 9.9                     | 6.3                     | 0.0           | 220                                   |
| PG9  | 500                 | 1              | i.p.       | 66.5                           | 4.19                                                     | 78.1                                                  | 6.1                     | 5.2                     | 1.2           | 225                                   |
| PG9  | 500                 | 2              | i.p.       | 82.1                           | 4.99                                                     | 76.5                                                  | 7.5                     | 6.3                     | 1.2           | 106                                   |
| PG9  | 500                 | 3              | i.p.       | 52.2                           | 4.03                                                     | 76.0                                                  | 7.8                     | 4.1                     | 1.9           | 185                                   |
| PG9  | 500                 | 4              | i.p.       | 192.7                          | 4.26                                                     | 79.5                                                  | 6.4                     | 6.3                     | 1.0           | 201                                   |
| PG9  | 500                 | 5              | i.p.       | 95.1                           | 5.25                                                     | 77.8                                                  | 8.1                     | 6.3                     | 1.3           | 100                                   |
| PG9  | 500                 | 6 <sup>†</sup> | i.p.       | ND                             | ND                                                       | ND                                                    | ND                      | ND                      | ND            | ND                                    |
| PG9  | 500                 | 7              | i.p.       | 612.2                          | 5.41                                                     | 76.0                                                  | 8.5                     | 6.3                     | 1.3           | 284                                   |
| 3TC  | 30 mg/kg/day        | 22             | i.p.       | 178.2                          | 4.52                                                     | 80.7                                                  | 9.2                     | 5.1                     | 1.8           | 122                                   |
| 3TC  | 30 mg/kg/day        | 23             | i.p.       | 195.1                          | 4.56                                                     | 77.1                                                  | 7.4                     | 4.0                     | 1.8           | 134                                   |
| 3TC  | 30 mg/kg/day        | 24             | i.p.       | 123.7                          | 4.28                                                     | 84.2                                                  | 5.0                     | 3.1                     | 1.6           | 193                                   |
| 3TC  | 30 mg/kg/day        | 25             | i.p.       | 88.2                           | 5.24                                                     | 82.7                                                  | 5.9                     | 5.1                     | 1.2           | 30                                    |
| 3TC  | 30 mg/kg/day        | 26             | i.p.       | 0.0                            | 2.88                                                     | 82.9                                                  | 6.1                     | 3.4                     | 1.8           | 118                                   |
| PG9  | 150, Mock-infected  | 41             | i.p.       | 0.0                            | <1.48                                                    | 49.9                                                  | 4.1                     | 5.0                     | 0.8           | 321                                   |
| PG9  | 150, Mock-infected  | 42             | i.p.       | 0.0                            | <1.48                                                    | 86.1                                                  | 6.3                     | 3.3                     | 1.9           | 47                                    |
| PG9  | 150, Mock-infected  | 43             | i.p.       | 0.0                            | <1.48                                                    | 85.2                                                  | 6.0                     | 4.9                     | 1.2           | 418                                   |
| PG9  | 150, Mock-infected  | 44             | i.p.       | 0.0                            | <1.48                                                    | 85.4                                                  | 6.0                     | 4.7                     | 1.3           | 119                                   |
| PG9  | 150, Mock-infected  | 45             | i.p.       | 0.0                            | <1.48                                                    | 78.8                                                  | 7.6                     | 4.1                     | 1.9           | 324                                   |
| PG9  | 150, Mock-infected  | 46             | i.p.       | 0.0                            | <1.48                                                    | 85.9                                                  | 6.5                     | 3.5                     | 1.8           | 140                                   |
| PG9  | 500, Mock-infected  | 34             | i.p.       | 0.0                            | <1.48                                                    | 82.7                                                  | 5.3                     | 2.8                     | 1.9           | 368                                   |
| PG9  | 500, Mock-infected  | 35             | i.p.       | 0.0                            | <1.48                                                    | 83.2                                                  | 6.3                     | 5.3                     | 1.2           | 262                                   |
| PG9  | 500, Mock-infected  | 36             | i.p.       | 0.0                            | <1.48                                                    | 82.2                                                  | 7.2                     | 4.8                     | 1.5           | 273                                   |
| PG9  | 500, Mock-infected  | 37             | i.p.       | 0.0                            | <1.48                                                    | 84.0                                                  | 6.7                     | 4.5                     | 1.5           | 361                                   |
| PG9  | 500, Mock-infected  | 38             | i.p.       | 0.0                            | <1.48                                                    | 81.2                                                  | 10.0                    | 6.2                     | 1.6           | 82                                    |
| PG9  | 500, Mock-infected  | 39             | i.p.       | 0.0                            | <1.48                                                    | 83.4                                                  | 7.1                     | 5.8                     | 1.2           | ND                                    |
| PG9  | 500, Mock-infected  | 40             | i.p.       | 0.0                            | <1.48                                                    | 81.8                                                  | 7.0                     | 3.9                     | 1.8           | 180                                   |
| NA   | NA                  | 47             | NA         | 0.0                            | <1.48                                                    | 84.0                                                  | 7.4                     | 5.0                     | 1.5           | 115                                   |
| NA   | NA                  | 48             | NA         | 0.0                            | <1.48                                                    | 85.0                                                  | 6.9                     | 4.4                     | 1.6           | 108                                   |
| NA   | NA                  | 49             | NA         | 0.0                            | <1.48                                                    | 81.5                                                  | 7.9                     | 6.1                     | 1.3           | 225                                   |
| NA   | NA                  | 50             | NA         | 0.0                            | <1.48                                                    | 85.5                                                  | 6.6                     | 4.3                     | 1.5           | 276                                   |

NA: Not applicable

ND: Not determined

<sup>†</sup> abnormal implant

**Supplementary Table 9.** Data for individual mice in Figure 5A (cohort generated with tissues from donor I).

| Drug    | Drug dose (µg/dose) | Mouse ID       | Drug route | p24 (pg/10 <sup>6</sup> cells) | HIV RNA (log <sub>10</sub> copies/10 <sup>6</sup> cells) | Thy/Liv Implant Cells                                 |                         |                         |               | Total cell yield (x 10 <sup>6</sup> ) |
|---------|---------------------|----------------|------------|--------------------------------|----------------------------------------------------------|-------------------------------------------------------|-------------------------|-------------------------|---------------|---------------------------------------|
|         |                     |                |            |                                |                                                          | CD4 <sup>+</sup> CD8 <sup>+</sup> Double-positive (%) | CD4 Single-positive (%) | CD8 Single-positive (%) | CD4/CD8 ratio |                                       |
| NA      | Untreated           | 36             | NA         | 318.0                          | 5.08                                                     | 57.2                                                  | 18.2                    | 8.9                     | 2.0           | 85                                    |
| NA      | Untreated           | 37             | NA         | 172.8                          | 4.79                                                     | 61.5                                                  | 14.6                    | 10.3                    | 1.4           | 45                                    |
| NA      | Untreated           | 38             | NA         | ND                             | 4.99                                                     | 41.2                                                  | 11.5                    | 12.3                    | 0.9           | 12                                    |
| NA      | Untreated           | 39             | NA         | 116.6                          | 4.90                                                     | 56.6                                                  | 18.7                    | 11.1                    | 1.7           | 121                                   |
| NA      | Untreated           | 40             | NA         | 280.3                          | 5.25                                                     | 55.3                                                  | 18.3                    | 11.5                    | 1.6           | 102                                   |
| NA      | Untreated           | 41             | NA         | 342.8                          | 5.35                                                     | 66.9                                                  | 14.2                    | 6.0                     | 2.4           | 332                                   |
| NA      | Untreated           | 42*            | NA         | ND                             | ND                                                       | ND                                                    | ND                      | ND                      | ND            | ND                                    |
| PG16    | 1.5                 | 22             | i.p.       | 169.2                          | 5.01                                                     | 74.1                                                  | 11.6                    | 4.1                     | 2.9           | 73                                    |
| PG16    | 1.5                 | 23             | i.p.       | 83.6                           | 4.94                                                     | 66.9                                                  | 15.9                    | 6.4                     | 2.5           | 503                                   |
| PG16    | 1.5                 | 24             | i.p.       | 130.3                          | 4.65                                                     | 73.0                                                  | 11.6                    | 5.2                     | 2.2           | 150                                   |
| PG16    | 1.5                 | 25             | i.p.       | 156.8                          | 4.94                                                     | 74.6                                                  | 11.0                    | 4.3                     | 2.6           | 119                                   |
| PG16    | 1.5                 | 26             | i.p.       | 161.6                          | 5.07                                                     | 73.2                                                  | 13.5                    | 3.7                     | 3.6           | 323                                   |
| PG16    | 1.5                 | 27             | i.p.       | 119.7                          | 4.74                                                     | 60.8                                                  | 19.5                    | 6.4                     | 3.0           | 144                                   |
| PG16    | 1.5                 | 28             | i.p.       | 196.3                          | 4.85                                                     | 57.4                                                  | 21.6                    | 7.5                     | 2.9           | 221                                   |
| PG16    | 5.0                 | 15             | i.p.       | 181.5                          | 4.20                                                     | 65.8                                                  | 17.5                    | 5.3                     | 3.3           | 401                                   |
| PG16    | 5.0                 | 16             | i.p.       | 52.6                           | 4.14                                                     | 67.0                                                  | 15.5                    | 6.8                     | 2.3           | 124                                   |
| PG16    | 5.0                 | 17             | i.p.       | 137.8                          | 4.58                                                     | 78.2                                                  | 10.0                    | 5.1                     | 2.0           | 177                                   |
| PG16    | 5.0                 | 18             | i.p.       | 129.5                          | 4.59                                                     | 61.0                                                  | 14.7                    | 12.5                    | 1.2           | 96                                    |
| PG16    | 5.0                 | 19             | i.p.       | 171.7                          | 4.96                                                     | 73.3                                                  | 10.7                    | 4.9                     | 2.2           | 551                                   |
| PG16    | 5.0                 | 20             | i.p.       | 0.0                            | 2.80                                                     | 74.4                                                  | 11.4                    | 4.7                     | 2.4           | 682                                   |
| PG16    | 5.0                 | 21             | i.p.       | 127.4                          | 4.37                                                     | 70.1                                                  | 13.6                    | 4.6                     | 2.9           | 319                                   |
| PG16    | 15                  | 8 <sup>†</sup> | i.p.       | ND                             | ND                                                       | ND                                                    | ND                      | ND                      | ND            | ND                                    |
| PG16    | 15                  | 9 <sup>†</sup> | i.p.       | ND                             | ND                                                       | ND                                                    | ND                      | ND                      | ND            | ND                                    |
| PG16    | 15                  | 10             | i.p.       | 68.5                           | 4.46                                                     | 73.8                                                  | 7.4                     | 2.6                     | 2.9           | 206                                   |
| PG16    | 15                  | 11             | i.p.       | 248.8                          | 4.46                                                     | 61.0                                                  | 18.0                    | 6.9                     | 2.6           | 171                                   |
| PG16    | 15                  | 12             | i.p.       | 0.0                            | 1.52                                                     | 76.1                                                  | 10.6                    | 3.9                     | 2.8           | 339                                   |
| PG16    | 15                  | 13             | i.p.       | 83.7                           | 4.82                                                     | 65.4                                                  | 16.9                    | 5.8                     | 2.9           | 251                                   |
| PG16    | 15                  | 14             | i.p.       | 150.2                          | 4.29                                                     | 72.9                                                  | 10.8                    | 4.3                     | 2.5           | 345                                   |
| PG16    | 50                  | 1              | i.p.       | 189.2                          | 4.62                                                     | 71.1                                                  | 14.5                    | 4.0                     | 3.7           | 324                                   |
| PG16    | 50                  | 2              | i.p.       | 145.1                          | 4.91                                                     | 74.1                                                  | 9.2                     | 4.8                     | 1.9           | 201                                   |
| PG16    | 50                  | 3              | i.p.       | 84.9                           | 4.37                                                     | 75.9                                                  | 7.0                     | 3.8                     | 1.8           | 171                                   |
| PG16    | 50                  | 4              | i.p.       | 0.0                            | <1.48                                                    | 66.5                                                  | 19.0                    | 6.7                     | 2.8           | 87                                    |
| PG16    | 50                  | 5*             | i.p.       | ND                             | ND                                                       | ND                                                    | ND                      | ND                      | ND            | ND                                    |
| PG16    | 50                  | 6              | i.p.       | 197.4                          | 4.73                                                     | 69.6                                                  | 15.2                    | 6.6                     | 2.3           | 344                                   |
| PG16    | 50                  | 7              | i.p.       | 162.3                          | 4.94                                                     | 57.9                                                  | 18.0                    | 8.5                     | 2.1           | 62                                    |
| Truvada | 2000/1300 mg/kg     | 29             | oral       | 218.7                          | 4.80                                                     | 67.5                                                  | 14.6                    | 6.1                     | 2.4           | 811                                   |
| Truvada | 2000/1300 mg/kg     | 30             | oral       | 443.1                          | 5.31                                                     | 58.5                                                  | 18.6                    | 7.0                     | 2.7           | 281                                   |
| Truvada | 2000/1300 mg/kg     | 31             | oral       | 90.3                           | 4.31                                                     | 78.2                                                  | 10.4                    | 3.4                     | 3.1           | 627                                   |
| Truvada | 2000/1300 mg/kg     | 32             | oral       | 113.3                          | 4.88                                                     | 64.9                                                  | 16.9                    | 7.1                     | 2.4           | 227                                   |
| Truvada | 2000/1300 mg/kg     | 33             | oral       | 218.9                          | 4.87                                                     | 61.3                                                  | 15.4                    | 6.5                     | 2.4           | 155                                   |
| Truvada | 2000/1300 mg/kg     | 34             | oral       | 187.8                          | 4.96                                                     | 72.1                                                  | 10.7                    | 4.3                     | 2.5           | 140                                   |
| Truvada | 2000/1300 mg/kg     | 35             | oral       | 194.6                          | 4.67                                                     | 70.2                                                  | 13.3                    | 5.3                     | 2.5           | 271                                   |
| NA      | Mock-infected       | 43*            | NA         | ND                             | ND                                                       | ND                                                    | ND                      | ND                      | ND            | ND                                    |
| NA      | Mock-infected       | 44             | NA         | 0.0                            | <1.48                                                    | 77.2                                                  | 11.9                    | 3.2                     | 3.8           | 1067                                  |
| NA      | Mock-infected       | 45             | NA         | 0.0                            | <1.48                                                    | 63.2                                                  | 24.5                    | 4.1                     | 6.0           | 33                                    |
| NA      | Mock-infected       | 46             | NA         | 0.0                            | <1.48                                                    | 78.1                                                  | 11.6                    | 3.2                     | 3.6           | 898                                   |
| NA      | Mock-infected       | 47             | NA         | 0.0                            | <1.48                                                    | 80.0                                                  | 10.4                    | 2.1                     | 4.9           | 559                                   |
| NA      | Mock-infected       | 48             | NA         | 0.0                            | <1.48                                                    | 81.0                                                  | 9.5                     | 3.0                     | 3.2           | 237                                   |
| NA      | Mock-infected       | 49             | NA         | 0.0                            | <1.48                                                    | 79.6                                                  | 10.4                    | 3.9                     | 2.7           | 679                                   |

NA: Not applicable

ND: Not determined

\* mouse died

† abnormal implant

**Supplementary Table 10.** Data for individual mice in Figure 5B (cohort generated with tissues from donor J).

| Drug    | Drug dose (µg/dose) | Mouse ID        | Drug route | p24 (pg/10 <sup>6</sup> cells) | HIV RNA (log <sub>10</sub> copies/10 <sup>6</sup> cells) | Thy/Liv Implant Cells                                 |                         |                         |               | Total cell yield (x 10 <sup>6</sup> ) |
|---------|---------------------|-----------------|------------|--------------------------------|----------------------------------------------------------|-------------------------------------------------------|-------------------------|-------------------------|---------------|---------------------------------------|
|         |                     |                 |            |                                |                                                          | CD4 <sup>+</sup> CD8 <sup>+</sup> Double-positive (%) | CD4 Single-positive (%) | CD8 Single-positive (%) | CD4/CD8 ratio |                                       |
| NA      | Untreated           | 36              | NA         | 70.1                           | 4.78                                                     | 75.5                                                  | 10.9                    | 5.4                     | 2.0           | 100                                   |
| NA      | Untreated           | 37              | NA         | 57.7                           | 4.54                                                     | 81.4                                                  | 8.1                     | 4.6                     | 1.8           | 70                                    |
| NA      | Untreated           | 38              | NA         | 66.3                           | 4.42                                                     | 77.5                                                  | 7.6                     | 3.9                     | 2.0           | 130                                   |
| NA      | Untreated           | 39              | NA         | 31.0                           | 3.87                                                     | 80.0                                                  | 8.4                     | 4.2                     | 2.0           | 49                                    |
| NA      | Untreated           | 40              | NA         | 117.4                          | 4.60                                                     | 71.6                                                  | 13.5                    | 6.1                     | 2.2           | 90                                    |
| NA      | Untreated           | 41              | NA         | 56.0                           | 4.32                                                     | 73.0                                                  | 11.7                    | 7.1                     | 1.7           | 50                                    |
| NA      | Untreated           | 42              | NA         | 92.8                           | 5.03                                                     | 70.9                                                  | 9.6                     | 5.7                     | 1.7           | 115                                   |
| PG16    | 1.5                 | 22              | i.p.       | 75.9                           | 4.58                                                     | 83.5                                                  | 7.1                     | 4.5                     | 1.6           | 200                                   |
| PG16    | 1.5                 | 23              | i.p.       | 53.8                           | 4.81                                                     | 77.9                                                  | 8.5                     | 4.6                     | 1.9           | 181                                   |
| PG16    | 1.5                 | 24              | i.p.       | 31.1                           | 4.47                                                     | 78.8                                                  | 7.7                     | 4.5                     | 1.7           | 170                                   |
| PG16    | 1.5                 | 25              | i.p.       | 34.4                           | 4.62                                                     | 69.9                                                  | 6.4                     | 3.2                     | 2.0           | 71                                    |
| PG16    | 1.5                 | 26              | i.p.       | 48.5                           | 4.66                                                     | 81.4                                                  | 7.3                     | 4.3                     | 1.7           | 78                                    |
| PG16    | 1.5                 | 27              | i.p.       | 28.5                           | 4.59                                                     | 79.7                                                  | 8.6                     | 4.6                     | 1.9           | 19                                    |
| PG16    | 1.5                 | 28              | i.p.       | 66.3                           | 3.87                                                     | 37.8                                                  | 12.0                    | 5.8                     | 2.1           | 36                                    |
| PG16    | 5.0                 | 15              | i.p.       | 55.0                           | 3.92                                                     | 81.9                                                  | 7.9                     | 5.0                     | 1.6           | 60                                    |
| PG16    | 5.0                 | 16              | i.p.       | 86.9                           | 4.49                                                     | 78.6                                                  | 7.1                     | 4.4                     | 1.6           | 72                                    |
| PG16    | 5.0                 | 17              | i.p.       | 58.8                           | 4.74                                                     | 71.3                                                  | 12.1                    | 5.3                     | 2.3           | 139                                   |
| PG16    | 5.0                 | 18 <sup>†</sup> | i.p.       | ND                             | ND                                                       | ND                                                    | ND                      | ND                      | ND            | ND                                    |
| PG16    | 5.0                 | 19              | i.p.       | 39.6                           | 4.40                                                     | 77.9                                                  | 9.1                     | 4.9                     | 1.8           | 121                                   |
| PG16    | 5.0                 | 20              | i.p.       | 40.6                           | 4.38                                                     | 71.3                                                  | 13.2                    | 6.1                     | 2.2           | 110                                   |
| PG16    | 5.0                 | 21              | i.p.       | 36.2                           | 4.56                                                     | 77.4                                                  | 8.0                     | 4.1                     | 1.9           | 41                                    |
| PG16    | 15                  | 8               | i.p.       | 15.6                           | 3.51                                                     | 76.4                                                  | 10.4                    | 4.4                     | 2.4           | 88                                    |
| PG16    | 15                  | 9               | i.p.       | 138.5                          | 3.88                                                     | 79.2                                                  | 8.7                     | 5.3                     | 1.7           | 58                                    |
| PG16    | 15                  | 10              | i.p.       | 91.6                           | 4.80                                                     | 78.6                                                  | 7.9                     | 4.0                     | 2.0           | 182                                   |
| PG16    | 15                  | 11              | i.p.       | 86.9                           | 4.82                                                     | 75.5                                                  | 9.0                     | 4.6                     | 2.0           | 125                                   |
| PG16    | 15                  | 12              | i.p.       | 23.4                           | 4.29                                                     | 77.2                                                  | 9.6                     | 4.6                     | 2.1           | 51                                    |
| PG16    | 15                  | 13              | i.p.       | 119.9                          | 3.99                                                     | 68.5                                                  | 9.9                     | 6.3                     | 1.6           | 124                                   |
| PG16    | 15                  | 14              | i.p.       | 66.8                           | 4.57                                                     | 77.7                                                  | 8.5                     | 4.6                     | 1.8           | 126                                   |
| PG16    | 50                  | 1 <sup>†</sup>  | i.p.       | ND                             | ND                                                       | ND                                                    | ND                      | ND                      | ND            | ND                                    |
| PG16    | 50                  | 2               | i.p.       | ND                             | ND                                                       | 48.1                                                  | 25.1                    | 18.7                    | 1.3           | 7                                     |
| PG16    | 50                  | 3               | i.p.       | 142.9                          | 4.35                                                     | 69.6                                                  | 13.8                    | 6.4                     | 2.1           | 72                                    |
| PG16    | 50                  | 4               | i.p.       | 121.3                          | 4.18                                                     | 73.8                                                  | 11.4                    | 6.7                     | 1.7           | 29                                    |
| PG16    | 50                  | 5               | i.p.       | 95.9                           | 4.69                                                     | 73.2                                                  | 11.1                    | 7.5                     | 1.5           | 32                                    |
| PG16    | 50                  | 6               | i.p.       | 103.0                          | 3.98                                                     | 76.0                                                  | 7.7                     | 4.7                     | 1.6           | 111                                   |
| PG16    | 50                  | 7               | i.p.       | 100.7                          | 4.02                                                     | 70.8                                                  | 11.2                    | 6.9                     | 1.6           | 101                                   |
| Truvada | 2000/1300 mg/kg     | 29              | oral       | 77.0                           | 4.73                                                     | 81.0                                                  | 6.7                     | 4.2                     | 1.6           | 89                                    |
| Truvada | 2000/1300 mg/kg     | 30              | oral       | 56.2                           | 4.79                                                     | 78.2                                                  | 9.1                     | 4.7                     | 1.9           | 121                                   |
| Truvada | 2000/1300 mg/kg     | 31              | oral       | 60.3                           | 4.68                                                     | 81.2                                                  | 7.4                     | 4.5                     | 1.7           | 37                                    |
| Truvada | 2000/1300 mg/kg     | 32              | oral       | 113.6                          | 3.80                                                     | 77.6                                                  | 9.1                     | 7.3                     | 1.2           | 21                                    |
| Truvada | 2000/1300 mg/kg     | 33              | oral       | 47.0                           | 4.69                                                     | 79.4                                                  | 7.9                     | 5.5                     | 1.4           | 31                                    |
| Truvada | 2000/1300 mg/kg     | 34              | oral       | 66.1                           | 3.61                                                     | 81.7                                                  | 6.4                     | 3.9                     | 1.6           | 101                                   |
| Truvada | 2000/1300 mg/kg     | 35              | oral       | 71.8                           | 4.14                                                     | 76.4                                                  | 9.6                     | 4.8                     | 2.0           | 71                                    |
| NA      | Mock-infected       | 43              | NA         | 0.0                            | 1.49                                                     | 82.6                                                  | 8.5                     | 3.7                     | 2.3           | 60                                    |
| NA      | Mock-infected       | 44              | NA         | 0.0                            | <1.48                                                    | 70.6                                                  | 15.3                    | 6.2                     | 2.5           | 94                                    |
| NA      | Mock-infected       | 45              | NA         | 0.0                            | <1.48                                                    | 76.1                                                  | 12.5                    | 5.1                     | 2.5           | 81                                    |
| NA      | Mock-infected       | 46              | NA         | 0.0                            | <1.48                                                    | 78.0                                                  | 11.1                    | 5.9                     | 1.9           | 49                                    |
| NA      | Mock-infected       | 47              | NA         | 0.0                            | <1.48                                                    | 90.2                                                  | 4.6                     | 2.3                     | 2.0           | 23                                    |
| NA      | Mock-infected       | 48              | NA         | 0.0                            | <1.48                                                    | 69.4                                                  | 16.9                    | 8.5                     | 2.0           | 23                                    |
| NA      | Mock-infected       | 49              | NA         | 0.0                            | <1.48                                                    | 80.0                                                  | 9.9                     | 4.6                     | 2.2           | 48                                    |

NA: Not applicable

ND: Not determined

<sup>†</sup> abnormal implant

**Supplementary Table 11.** Data for individual mice in Figure 6A (cohort generated with tissues from donor K).

| Drug | Drug dose<br>( $\mu$ g/dose, days<br>from inoculation) | Mouse<br>ID     | Drug<br>route | p24<br>(pg/ $10^6$<br>cells) | HIV RNA<br>(log <sub>10</sub><br>copies/<br>$10^6$ cells) | Thy/Liv Implant Cells                                           |                                   |                                   |                  | Total cell<br>yield<br>( $\times 10^6$ ) |
|------|--------------------------------------------------------|-----------------|---------------|------------------------------|-----------------------------------------------------------|-----------------------------------------------------------------|-----------------------------------|-----------------------------------|------------------|------------------------------------------|
|      |                                                        |                 |               |                              |                                                           | CD4 <sup>+</sup> CD8 <sup>+</sup><br>Double-<br>positive<br>(%) | CD4<br>Single-<br>positive<br>(%) | CD8<br>Single-<br>positive<br>(%) | CD4/CD8<br>ratio |                                          |
| NA   | Untreated                                              | 40              | NA            | 561.3                        | 5.30                                                      | 55.4                                                            | 16.3                              | 9.6                               | 1.7              | 6                                        |
| NA   | Untreated                                              | 41              | NA            | 729.4                        | 5.11                                                      | 65.8                                                            | 14.3                              | 7.0                               | 2.0              | 23                                       |
| NA   | Untreated                                              | 42              | NA            | 951.1                        | 5.64                                                      | 67.4                                                            | 14.5                              | 6.8                               | 2.1              | 11                                       |
| NA   | Untreated                                              | 43              | NA            | 384.5                        | 5.22                                                      | 71.9                                                            | 12.2                              | 8.7                               | 1.4              | 36                                       |
| NA   | Untreated                                              | 44              | NA            | 647.1                        | 5.47                                                      | 66.4                                                            | 13.3                              | 7.8                               | 1.7              | 25                                       |
| NA   | Untreated                                              | 45              | NA            | 208.5                        | 5.04                                                      | 77.1                                                            | 5.7                               | 4.2                               | 1.4              | 3                                        |
| NA   | Untreated                                              | 46              | NA            | 898.4                        | 5.55                                                      | 41.5                                                            | 24.2                              | 14.7                              | 1.6              | 42                                       |
| PG16 | 5, -1                                                  | 1               | i.p.          | 423.5                        | 4.86                                                      | 77.1                                                            | 11.0                              | 5.1                               | 2.2              | 44                                       |
| PG16 | 5, -1                                                  | 2               | i.p.          | 346.5                        | 5.00                                                      | 76.6                                                            | 11.3                              | 5.0                               | 2.2              | 55                                       |
| PG16 | 5, -1                                                  | 3               | i.p.          | 0.0                          | 1.58                                                      | 80.0                                                            | 9.6                               | 3.7                               | 2.6              | 71                                       |
| PG16 | 5, -1                                                  | 4               | i.p.          | 15.3                         | 4.73                                                      | 80.7                                                            | 8.8                               | 3.8                               | 2.3              | 36                                       |
| PG16 | 5, -1                                                  | 5               | i.p.          | 516.3                        | 5.32                                                      | 80.0                                                            | 9.2                               | 3.7                               | 2.5              | 6                                        |
| PG16 | 5, +8                                                  | 6               | i.p.          | 608.9                        | 5.34                                                      | 75.9                                                            | 10.9                              | 5.4                               | 2.0              | 45                                       |
| PG16 | 5, +8                                                  | 7               | i.p.          | 337.7                        | 5.37                                                      | 68.8                                                            | 14.4                              | 8.7                               | 1.7              | 11                                       |
| PG16 | 5, +8                                                  | 8               | i.p.          | 179.7                        | 4.79                                                      | 75.8                                                            | 11.8                              | 6.3                               | 1.9              | 78                                       |
| PG16 | 5, +8                                                  | 9               | i.p.          | 162.9                        | 4.41                                                      | 74.7                                                            | 11.4                              | 7.2                               | 1.6              | 51                                       |
| PG16 | 5, +8                                                  | 10              | i.p.          | 294.6                        | 4.78                                                      | 77.3                                                            | 8.8                               | 6.6                               | 1.3              | 47                                       |
| PG16 | 5, +8                                                  | 11              | i.p.          | 300.9                        | 5.27                                                      | 72.2                                                            | 10.1                              | 7.4                               | 1.4              | 23                                       |
| PG16 | 5, +8                                                  | 12              | i.p.          | 140.7                        | 4.86                                                      | 75.4                                                            | 9.6                               | 6.3                               | 1.5              | 34                                       |
| PG16 | 5, +15                                                 | 13              | i.p.          | 101.6                        | 4.34                                                      | 75.2                                                            | 10.5                              | 6.3                               | 1.7              | 32                                       |
| PG16 | 5, +15                                                 | 14              | i.p.          | 86.6                         | 4.38                                                      | 66.1                                                            | 14.9                              | 10.6                              | 1.4              | 6                                        |
| PG16 | 5, +15                                                 | 15              | i.p.          | 453.8                        | 5.11                                                      | 38.7                                                            | 36.1                              | 12.9                              | 2.8              | 22                                       |
| PG16 | 5, +15                                                 | 16              | i.p.          | 407.5                        | 5.31                                                      | 46.0                                                            | 25.8                              | 16.1                              | 1.6              | 23                                       |
| PG16 | 5, +15                                                 | 17              | i.p.          | 188.6                        | 4.58                                                      | 72.2                                                            | 11.5                              | 7.2                               | 1.6              | 18                                       |
| PG16 | 5, +15                                                 | 18              | i.p.          | 619.7                        | 5.35                                                      | 30.1                                                            | 35.3                              | 23.3                              | 1.5              | 9                                        |
| PG16 | 5, +15                                                 | 19              | i.p.          | 193.1                        | 4.39                                                      | 71.0                                                            | 13.5                              | 7.7                               | 1.7              | 21                                       |
| PG16 | 50, +8                                                 | 20              | i.p.          | 258.2                        | 4.82                                                      | 78.2                                                            | 5.8                               | 4.4                               | 1.3              | 14                                       |
| PG16 | 50, +8                                                 | 21              | i.p.          | 295.2                        | 5.01                                                      | 74.0                                                            | 12.0                              | 7.0                               | 1.7              | 45                                       |
| PG16 | 50, +8                                                 | 22              | i.p.          | 567.1                        | 5.68                                                      | 64.7                                                            | 15.0                              | 10.9                              | 1.4              | 67                                       |
| PG16 | 50, +8                                                 | 23              | i.p.          | 266.5                        | 4.79                                                      | 66.1                                                            | 14.1                              | 9.7                               | 1.5              | 34                                       |
| PG16 | 50, +8                                                 | 24 <sup>†</sup> | i.p.          | ND                           | ND                                                        | ND                                                              | ND                                | ND                                | ND               | ND                                       |
| PG16 | 50, +8                                                 | 25              | i.p.          | 276.0                        | 4.61                                                      | 72.3                                                            | 13.7                              | 6.5                               | 2.1              | 62                                       |
| PG16 | 50, +8                                                 | 26              | i.p.          | 283.6                        | 4.54                                                      | 74.8                                                            | 11.2                              | 6.6                               | 1.7              | 55                                       |
| PG16 | 50, +15                                                | 27              | i.p.          | 361.2                        | 4.63                                                      | 76.6                                                            | 10.9                              | 5.3                               | 2.1              | 75                                       |
| PG16 | 50, +15                                                | 28              | i.p.          | 35.8                         | 4.27                                                      | 65.4                                                            | 14.0                              | 9.5                               | 1.5              | 19                                       |
| PG16 | 50, +15                                                | 29              | i.p.          | 334.7                        | 4.88                                                      | 75.7                                                            | 10.4                              | 5.6                               | 1.9              | 111                                      |
| PG16 | 50, +15                                                | 30              | i.p.          | 576.1                        | 5.41                                                      | 20.6                                                            | 49.0                              | 17.0                              | 2.9              | 12                                       |
| PG16 | 50, +15                                                | 31              | i.p.          | 194.1                        | 4.63                                                      | 68.7                                                            | 10.8                              | 6.7                               | 1.6              | 23                                       |
| PG16 | 50, +15                                                | 32              | i.p.          | 435.8                        | 5.15                                                      | 68.0                                                            | 13.4                              | 7.5                               | 1.8              | 24                                       |
| PG16 | 50, +15                                                | 33              | i.p.          | 416.7                        | 5.26                                                      | 69.0                                                            | 13.4                              | 6.7                               | 2.0              | 30                                       |
| PG16 | 50, +22                                                | 34              | i.p.          | 197.2                        | 4.79                                                      | 61.8                                                            | 18.4                              | 14.2                              | 1.3              | 11                                       |
| PG16 | 50, +22                                                | 35              | i.p.          | 223.0                        | 4.69                                                      | 64.1                                                            | 19.7                              | 9.8                               | 2.0              | 31                                       |
| PG16 | 50, +22                                                | 36              | i.p.          | 214.1                        | 4.82                                                      | 82.8                                                            | 7.2                               | 5.2                               | 1.4              | 37                                       |
| PG16 | 50, +22                                                | 37              | i.p.          | 605.7                        | 4.85                                                      | 68.6                                                            | 14.9                              | 9.4                               | 1.6              | 19                                       |
| PG16 | 50, +22                                                | 38*             | i.p.          | ND                           | ND                                                        | ND                                                              | ND                                | ND                                | ND               | ND                                       |
| PG16 | 50, +22                                                | 39              | i.p.          | 147.0                        | 5.07                                                      | 76.5                                                            | 13.2                              | 4.2                               | 3.1              | 46                                       |
| NA   | Mock-infected                                          | 47              | NA            | 0.0                          | <1.48                                                     | 86.5                                                            | 6.9                               | 1.5                               | 4.5              | 92                                       |
| NA   | Mock-infected                                          | 48              | NA            | 0.0                          | <1.48                                                     | 84.2                                                            | 6.8                               | 1.8                               | 3.8              | 112                                      |
| NA   | Mock-infected                                          | 49              | NA            | 0.0                          | <1.48                                                     | 77.1                                                            | 7.9                               | 3.2                               | 2.5              | 249                                      |
| NA   | Mock-infected                                          | 50              | NA            | 0.0                          | <1.48                                                     | 76.9                                                            | 8.4                               | 3.5                               | 2.4              | 99                                       |

NA: Not applicable

ND: Not determined

\* mouse died

<sup>†</sup> abnormal implant

**Supplementary Table 12.** Data for individual mice in Figure 6B (cohort generated with tissues from donor L).

| Drug | Drug dose<br>( $\mu\text{g}/\text{dose}$ ,<br>termination<br>weeks) | Mouse<br>ID     | Drug<br>route | p24<br>( $\text{pg}/10^6$<br>cells) | HIV RNA<br>( $\log_{10}$<br>copies/<br>$10^6$ cells) | Thy/Liv Implant Cells                                           |                                   |                                   |                  | Total<br>cell yield<br>( $\times 10^6$ ) |
|------|---------------------------------------------------------------------|-----------------|---------------|-------------------------------------|------------------------------------------------------|-----------------------------------------------------------------|-----------------------------------|-----------------------------------|------------------|------------------------------------------|
|      |                                                                     |                 |               |                                     |                                                      | CD4 <sup>+</sup> CD8 <sup>+</sup><br>Double-<br>positive<br>(%) | CD4<br>Single-<br>positive<br>(%) | CD8<br>Single-<br>positive<br>(%) | CD4/CD8<br>ratio |                                          |
| NA   | Untreated, 17                                                       | 1               | NA            | 296.5                               | 5.25                                                 | 72.9                                                            | 10.0                              | 7.7                               | 1.3              | 111                                      |
| NA   | Untreated, 17                                                       | 2               | NA            | 75.8                                | 4.65                                                 | 80.7                                                            | 7.5                               | 5.3                               | 1.4              | 111                                      |
| NA   | Untreated, 17                                                       | 3 <sup>†</sup>  | NA            | ND                                  | ND                                                   | ND                                                              | ND                                | ND                                | ND               | ND                                       |
| NA   | Untreated, 17                                                       | 4               | NA            | 36.2                                | 4.87                                                 | 49.0                                                            | 19.6                              | 20.9                              | 0.9              | 77                                       |
| NA   | Untreated, 17                                                       | 5 <sup>†</sup>  | NA            | ND                                  | ND                                                   | ND                                                              | ND                                | ND                                | ND               | ND                                       |
| NA   | Untreated, 17                                                       | 6               | NA            | 198.5                               | 5.02                                                 | 75.9                                                            | 11.3                              | 4.2                               | 2.7              | 196                                      |
| PG16 | 500, 20                                                             | 7 <sup>†</sup>  | i.p.          | ND                                  | ND                                                   | ND                                                              | ND                                | ND                                | ND               | ND                                       |
| PG16 | 500, 20                                                             | 8               | i.p.          | 129.0                               | 4.96                                                 | 79.6                                                            | 7.2                               | 7.0                               | 1.0              | 88                                       |
| PG16 | 500, 20                                                             | 9               | i.p.          | 439.0                               | 6.65                                                 | 76.1                                                            | 3.9                               | 8.6                               | 0.5              | 151                                      |
| PG16 | 500, 20                                                             | 10 <sup>†</sup> | i.p.          | ND                                  | ND                                                   | ND                                                              | ND                                | ND                                | ND               | ND                                       |
| PG16 | 500, 20                                                             | 11              | i.p.          | 375.9                               | 5.65                                                 | 75.7                                                            | 7.1                               | 7.3                               | 1.0              | 169                                      |
| PG16 | 500, 20                                                             | 12              | i.p.          | 265.8                               | 5.20                                                 | 80.0                                                            | 6.6                               | 4.8                               | 1.4              | 404                                      |
| PBS  | 0, 20                                                               | 13              | i.p.          | 274.2                               | 5.15                                                 | 78.2                                                            | 6.9                               | 6.7                               | 1.0              | 78                                       |
| PBS  | 0, 20                                                               | 14              | i.p.          | 445.9                               | 5.83                                                 | 67.8                                                            | 9.3                               | 10.5                              | 0.9              | 119                                      |
| PBS  | 0, 20                                                               | 15              | i.p.          | 177.9                               | 5.81                                                 | 77.4                                                            | 7.9                               | 6.6                               | 1.2              | 371                                      |
| PBS  | 0, 20                                                               | 16              | i.p.          | 497.6                               | 5.59                                                 | 71.2                                                            | 8.2                               | 7.3                               | 1.1              | 129                                      |
| PBS  | 0, 20                                                               | 17              | i.p.          | 140.2                               | 5.27                                                 | 81.5                                                            | 5.4                               | 5.3                               | 1.0              | 151                                      |
| PBS  | 0, 20                                                               | 18              | i.p.          | 241.1                               | 5.72                                                 | 79.6                                                            | 5.3                               | 6.4                               | 0.8              | 111                                      |
| PBS  | 0, 20                                                               | 19              | i.p.          | 331.2                               | 5.84                                                 | 73.0                                                            | 7.5                               | 10.7                              | 0.7              | 47                                       |
| NA   | Mock-infected, 17                                                   | 20              | NA            | 0.0                                 | <1.48                                                | 28.6                                                            | 7.4                               | 2.4                               | 3.1              | 361                                      |
| NA   | Mock-infected, 17                                                   | 21              | NA            | 0.0                                 | <1.48                                                | 85.3                                                            | 7.1                               | 2.2                               | 3.2              | 346                                      |
| NA   | Mock-infected, 17                                                   | 22              | NA            | 0.0                                 | <1.48                                                | 58.5                                                            | 5.3                               | 2.4                               | 2.2              | 148                                      |
| NA   | Mock-infected, 17                                                   | 23              | NA            | 0.0                                 | <1.48                                                | 31.2                                                            | 9.3                               | 2.7                               | 3.5              | 357                                      |
| NA   | Mock-infected, 17                                                   | 24 <sup>†</sup> | NA            | ND                                  | ND                                                   | ND                                                              | ND                                | ND                                | ND               | ND                                       |
| NA   | Mock-infected, 20                                                   | 25              | NA            | 0.0                                 | <1.48                                                | 83.5                                                            | 6.8                               | 4.4                               | 1.5              | 389                                      |
| NA   | Mock-infected, 20                                                   | 26              | NA            | 0.0                                 | <1.48                                                | 81.7                                                            | 8.9                               | 4.3                               | 2.1              | 169                                      |
| NA   | Mock-infected, 20                                                   | 27              | NA            | 0.0                                 | <1.48                                                | 76.2                                                            | 11.7                              | 6.5                               | 1.8              | 264                                      |
| NA   | Mock-infected, 20                                                   | 28              | NA            | 0.0                                 | <1.48                                                | 80.8                                                            | 8.5                               | 3.7                               | 2.3              | 355                                      |
| NA   | Mock-infected, 20                                                   | 29 <sup>†</sup> | NA            | ND                                  | ND                                                   | ND                                                              | ND                                | ND                                | ND               | ND                                       |

NA: Not applicable

ND: Not determined

<sup>†</sup> abnormal implant

**Supplementary Table 13.** Data for individual mice in Figure 6C (cohort generated with tissues and CD34<sup>+</sup> cells from donor M).

| HIV RNA (log <sub>10</sub> copies/10 <sup>6</sup> cells) and CD4 <sup>+</sup> T-cell count (cells/μl whole blood) |                 |                                                      |                     |            |         |                        |         |                        |         |                        |         |                        |         |                        |  |
|-------------------------------------------------------------------------------------------------------------------|-----------------|------------------------------------------------------|---------------------|------------|---------|------------------------|---------|------------------------|---------|------------------------|---------|------------------------|---------|------------------------|--|
| Weeks after HIV inoculation                                                                                       |                 |                                                      |                     |            |         |                        |         |                        |         |                        |         |                        |         |                        |  |
| Drug                                                                                                              | Mouse ID        | HIV <sub>JR-CSF</sub> inoculum (TCID <sub>50</sub> ) | Drug dose (μg/dose) | Drug route | Week 4  |                        | Week 6  |                        | Week 8  |                        | Week 10 |                        | Week 12 |                        |  |
|                                                                                                                   |                 |                                                      |                     |            | HIV RNA | CD4 <sup>+</sup> cells |  |
| PG16                                                                                                              | 1               | 8,000                                                | 1.5                 | i.p.       | 4.17    | 278                    | 4.09    | 198                    | 4.33    | 141                    | 3.94    | 21                     | 4.14    | 39                     |  |
| PG16                                                                                                              | 5               | 8,000                                                | 1.5                 | i.p.       | 4.41    | 212                    | 4.06    | 77                     | 3.82    | 101                    | 3.87    | 17                     | 3.80    | 8                      |  |
| PG16                                                                                                              | 15              | 8,000                                                | 1.5                 | i.p.       | 4.62    | 64                     | 4.04    | 50                     | 4.34    | 52                     | NA*     | NA*                    | NA*     | NA*                    |  |
| PG16                                                                                                              | 21              | 8,000                                                | 1.5                 | i.p.       | 3.94    | 38                     | 3.70    | 14                     | 4.46    | 41                     | 5.00    | 34                     | NA*     | NA*                    |  |
| PG16                                                                                                              | 29              | 8,000                                                | 1.5                 | i.p.       | 4.48    | 164                    | 3.75    | 64                     | 3.99    | 40                     | 4.16    | 37                     | 4.08    | 47                     |  |
| PG16                                                                                                              | 45              | 8,000                                                | 1.5                 | i.p.       | 4.02    | 40                     | 3.96    | 40                     | 3.94    | 15                     | 4.26    | 7                      | 3.96    | 5                      |  |
| PBS                                                                                                               | 4               | 8,000                                                | NA                  | i.p.       | 4.71    | 362                    | 4.20    | 322                    | 4.10    | 107                    | 3.88    | 45                     | 4.23    | 128                    |  |
| PBS                                                                                                               | 14              | 8,000                                                | NA                  | i.p.       | 4.35    | 64                     | 3.77    | 64                     | 4.20    | 8                      | 4.49    | 3                      | NA*     | NA*                    |  |
| PBS                                                                                                               | 16              | 8,000                                                | NA                  | i.p.       | 4.26    | 138                    | 3.83    | 207                    | 3.90    | 153                    | 4.10    | 29                     | 3.83    | 7                      |  |
| PBS                                                                                                               | 24              | 8,000                                                | NA                  | i.p.       | 4.23    | 95                     | 3.99    | 57                     | 4.08    | 107                    | 4.30    | 84                     | 4.06    | 62                     |  |
| PBS                                                                                                               | 34              | 8,000                                                | NA                  | i.p.       | 4.42    | 243                    | 3.69    | 70                     | 3.50    | 8                      | 4.05    | 22                     | 4.57    | 155                    |  |
| PBS                                                                                                               | 38              | 8,000                                                | NA                  | i.p.       | 4.31    | 63                     | 3.96    | 69                     | 3.92    | 94                     | 3.80    | 45                     | 4.03    | 56                     |  |
| PBS                                                                                                               | 40              | 8,000                                                | NA                  | i.p.       | 4.28    | 130                    | 3.74    | 82                     | 3.91    | 61                     | ND      | ND                     | 3.74    | 65                     |  |
| NA                                                                                                                | 2               | 8,000                                                | NA                  | NA         | <1.88   | 621                    | ND      | ND                     | <1.88   | 461                    | ND      | ND                     | ND      | 740                    |  |
| NA                                                                                                                | 3               | 8,000                                                | NA                  | NA         | <1.88   | 368                    | ND      | ND                     | <1.88   | 324                    | ND      | ND                     | ND      | 287                    |  |
| NA                                                                                                                | 6               | 8,000                                                | NA                  | NA         | <1.88   | 321                    | ND      | ND                     | <1.88   | 180                    | ND      | ND                     | ND      | 280                    |  |
| NA                                                                                                                | 7               | 8,000                                                | NA                  | NA         | 2.02    | 217                    | ND      | ND                     | <1.88   | 218                    | ND      | ND                     | ND      | 364                    |  |
| NA                                                                                                                | 8               | 8,000                                                | NA                  | NA         | <1.88   | 196                    | ND      | ND                     | <1.88   | 116                    | ND      | ND                     | ND      | 197                    |  |
| NA                                                                                                                | 9               | 8,000                                                | NA                  | NA         | <1.88   | 209                    | ND      | ND                     | <1.88   | 236                    | ND      | ND                     | ND      | 174                    |  |
| NA                                                                                                                | 10              | 8,000                                                | NA                  | NA         | <1.88   | 704                    | ND      | ND                     | <1.88   | 507                    | ND      | ND                     | ND      | 963                    |  |
| NA                                                                                                                | 11              | 8,000                                                | NA                  | NA         | <1.88   | 183                    | ND      | ND                     | <1.88   | 187                    | ND      | ND                     | ND      | 233                    |  |
| NA                                                                                                                | 12              | 8,000                                                | NA                  | NA         | <1.88   | 215                    | ND      | ND                     | <1.88   | 127                    | ND      | ND                     | ND      | 138                    |  |
| NA                                                                                                                | 13              | 8,000                                                | NA                  | NA         | <1.88   | 432                    | ND      | ND                     | <1.88   | 331                    | ND      | ND                     | ND      | 191                    |  |
| NA                                                                                                                | 17              | 8,000                                                | NA                  | NA         | <1.88   | 157                    | ND      | ND                     | <1.88   | 153                    | ND      | ND                     | ND      | 69                     |  |
| NA                                                                                                                | 18              | 8,000                                                | NA                  | NA         | <1.88   | 92                     | ND      | ND                     | <1.88   | 127                    | ND      | ND                     | ND      | 57                     |  |
| NA                                                                                                                | 19              | 8,000                                                | NA                  | NA         | <1.88   | 138                    | ND      | ND                     | <1.88   | 184                    | ND      | ND                     | ND      | 77                     |  |
| NA                                                                                                                | 20              | 8,000                                                | NA                  | NA         | <1.88   | 171                    | ND      | ND                     | <1.88   | 176                    | ND      | ND                     | ND      | 149                    |  |
| NA                                                                                                                | 22              | 8,000                                                | NA                  | NA         | <1.88   | 368                    | ND      | ND                     | <1.88   | 556                    | ND      | ND                     | ND      | 193                    |  |
| NA                                                                                                                | 23              | 8,000                                                | NA                  | NA         | <1.88   | 120                    | ND      | ND                     | <1.88   | 74                     | ND      | ND                     | ND      | 91                     |  |
| NA                                                                                                                | 25              | 8,000                                                | NA                  | NA         | <1.88   | 538                    | ND      | ND                     | <1.88   | 482                    | ND      | ND                     | ND      | NA*                    |  |
| NA                                                                                                                | 26              | 8,000                                                | NA                  | NA         | <1.88   | 291                    | ND      | ND                     | 2.29    | 538                    | ND      | ND                     | ND      | 305                    |  |
| NA                                                                                                                | 27              | 8,000                                                | NA                  | NA         | <1.88   | 527                    | ND      | ND                     | <1.88   | 380                    | ND      | ND                     | ND      | 226                    |  |
| NA                                                                                                                | 28              | 8,000                                                | NA                  | NA         | <1.88   | 388                    | ND      | ND                     | <1.88   | 396                    | ND      | ND                     | ND      | NA*                    |  |
| NA                                                                                                                | 30              | 8,000                                                | NA                  | NA         | <1.88   | 444                    | ND      | ND                     | 1.90    | 236                    | ND      | ND                     | ND      | 324                    |  |
| NA                                                                                                                | 31              | 8,000                                                | NA                  | NA         | <1.88   | 833                    | ND      | ND                     | <1.88   | 344                    | ND      | ND                     | ND      | 506                    |  |
| NA                                                                                                                | 32              | 8,000                                                | NA                  | NA         | 1.90    | 353                    | ND      | ND                     | <1.88   | 367                    | ND      | ND                     | ND      | 312                    |  |
| NA                                                                                                                | 33              | 8,000                                                | NA                  | NA         | <1.88   | 248                    | ND      | ND                     | <1.88   | 245                    | ND      | ND                     | ND      | NA*                    |  |
| NA                                                                                                                | 35              | 8,000                                                | NA                  | NA         | <1.88   | 380                    | ND      | ND                     | 2.79    | 383                    | ND      | ND                     | ND      | 196                    |  |
| NA                                                                                                                | 36              | 8,000                                                | NA                  | NA         | <1.88   | 283                    | ND      | ND                     | <1.88   | 422                    | ND      | ND                     | ND      | 319                    |  |
| NA                                                                                                                | 37              | 8,000                                                | NA                  | NA         | <1.88   | 225                    | ND      | ND                     | <1.88   | 373                    | ND      | ND                     | ND      | 145                    |  |
| NA                                                                                                                | 39              | 8,000                                                | NA                  | NA         | 1.92    | 81                     | ND      | ND                     | <1.88   | 224                    | ND      | ND                     | ND      | 153                    |  |
| NA                                                                                                                | 41              | 8,000                                                | NA                  | NA         | <1.88   | 251                    | ND      | ND                     | <1.88   | 327                    | ND      | ND                     | ND      | 272                    |  |
| NA                                                                                                                | 42              | 8,000                                                | NA                  | NA         | <1.88   | 450                    | ND      | ND                     | <1.88   | 689                    | ND      | ND                     | ND      | 64                     |  |
| NA                                                                                                                | 43              | 8,000                                                | NA                  | NA         | <1.88   | 320                    | ND      | ND                     | <1.88   | 321                    | ND      | ND                     | ND      | 78                     |  |
| NA                                                                                                                | 44              | 8,000                                                | NA                  | NA         | <1.88   | 188                    | ND      | ND                     | <1.88   | 323                    | ND      | ND                     | ND      | 122                    |  |
| NA                                                                                                                | 46              | 8,000                                                | NA                  | NA         | <1.88   | 140                    | ND      | ND                     | <1.88   | 222                    | ND      | ND                     | ND      | 154                    |  |
| NA                                                                                                                | 47              | 8,000                                                | NA                  | NA         | <1.88   | 216                    | ND      | ND                     | <1.88   | 278                    | ND      | ND                     | ND      | 341                    |  |
| NA                                                                                                                | 48              | NA                                                   | NA                  | NA         | <1.88   | 191                    | <1.88   | 279                    | <1.88   | 244                    | <1.88   | 247                    | ND      | 319                    |  |
| NA                                                                                                                | 49              | NA                                                   | NA                  | NA         | <1.88   | 81                     | <1.88   | 111                    | <1.88   | 182                    | <1.88   | 113                    | ND      | 177                    |  |
| NA                                                                                                                | 50              | NA                                                   | NA                  | NA         | <1.88   | 218                    | <1.88   | 205                    | <1.88   | 233                    | <1.88   | 167                    | ND      | 98                     |  |
| NA                                                                                                                | 51              | NA                                                   | NA                  | NA         | <1.88   | 265                    | <1.88   | 638                    | <1.88   | 316                    | <1.88   | 242                    | ND      | NA*                    |  |
| NA                                                                                                                | 52              | NA                                                   | NA                  | NA         | <1.88   | 309                    | <1.88   | 366                    | <1.88   | 324                    | <1.88   | 329                    | ND      | 412                    |  |
| NA                                                                                                                | 53              | NA                                                   | NA                  | NA         | <1.88   | 257                    | <1.88   | 404                    | <1.88   | 467                    | <1.88   | 221                    | ND      | 851                    |  |
| NA                                                                                                                | 54              | NA                                                   | NA                  | NA         | <1.88   | 84                     | <1.88   | 105                    | <1.88   | 91                     | <1.88   | 68                     | ND      | 74                     |  |
| NA                                                                                                                | 55 <sup>†</sup> | 8,000                                                | NA                  | NA         | <1.88   | 80                     | ND      | ND                     | <1.88   | 54                     | ND      | ND                     | ND      | NA*                    |  |
| NA                                                                                                                | 56 <sup>†</sup> | 8,000                                                | NA                  | NA         | <1.88   | 4                      | ND      | ND                     | <1.88   | 3                      | ND      | ND                     | ND      | 0                      |  |
| NA                                                                                                                | 57 <sup>†</sup> | 8,000                                                | NA                  | NA         | <1.88   | 94                     | ND      | ND                     | <1.88   | 151                    | ND      | ND                     | ND      | 173                    |  |
| NA                                                                                                                | 58 <sup>†</sup> | 8,000                                                | NA                  | NA         | <1.88   | 22                     | ND      | ND                     | <1.88   | 16                     | ND      | ND                     | ND      | 9                      |  |
| NA                                                                                                                | 59 <sup>†</sup> | 8,000                                                | NA                  | NA         | <1.88   | 7                      | ND      | ND                     | <1.88   | 2                      | ND      | ND                     | ND      | 0                      |  |

NA: Not applicable

ND: Not determined

\*mouse died

<sup>†</sup>NSG-hu Thy/Liv mice; not injected with human CD34<sup>+</sup> cells.
